1 ***Full Title: Violence against women and children in Yemen: A mixed-***  
2 ***methods systematic review***

3 ***Short Title: Violence against women and children in Yemen***

4

5 Samana Shreedhar<sup>1</sup>, Sayali Arvind Chavan<sup>1,2</sup>, Marwah Al-Zumair<sup>2</sup>, Mirna Naccache<sup>2</sup>, Priya

6 Shreedhar,<sup>2</sup> Lauren Maxwell<sup>2\*</sup>

7 <sup>1</sup> Institute of Tropical Medicine and Public Health, Charité-Universitätsmedizin Berlin, Berlin,

8 Germany

9 <sup>2</sup> Heidelberg Institute of Global Health, Universitatklinikum Heidelberg, Germany

10 \*Corresponding Author

11 Email: [lauren.maxwell@uni-heidelberg.de](mailto:lauren.maxwell@uni-heidelberg.de) (LM)

12 **Abstract**

13 Violence against women and children (VAWC) is a significant health and human rights issue  
14 closely tied to multiple Sustainable Development Goals. While VAWC is prevalent in all  
15 countries, the severity and incidence of VAWC increase during wars, natural disasters,  
16 economic crises, and pandemics, all of which have affected Yemen in recent years. This

17 systematic review synthesizes evidence from qualitative and quantitative studies on the types,  
18 prevalence, perpetrators of, and risk factors for VAWC in Yemen. Before initiating the search,  
19 the protocol and search strategy were registered to PROSPERO (CRD42021237855). We  
20 systematically searched four biomedical databases and grey literature sources and used reverse  
21 snowball sampling to identify eligible studies. The 31 studies included in the analysis depicted a  
22 range of forms of VAWC, encompassing honor violence, female genital mutilation and cutting,  
23 early and very early marriage, tourist marriage, family and intimate partner violence, and  
24 gender inequities in access to food, education, and medical care. Included studies reported a high  
25 prevalence of many forms of violence, including corporal punishment in schools and intimate partner  
26 violence. We reviewed study quality and how studies addressed ethical concerns in VAWC-related  
27 research. We found that several studies did not report ethics review or interviewer training and no  
28 studies discussed safety planning or addressing the mental health needs of participants in VAWC  
29 research. This systematic review provides a much-needed synthesis of existing research on  
30 VAWC in Yemen. Since the start of the 2014 war, Yemen has become the world's largest  
31 humanitarian crisis, with the highest rate of maternal mortality and gender inequality in the  
32 world. We only identified one study initiated after the recent war in Yemen. This deficiency  
33 represents a missed opportunity to understand how the ongoing war has reversed prior gains in  
34 reducing the prevalence of child and very early child marriage and introduced new forms of  
35 gender-based violence, including tourist marriage.

36

37 **Keywords**

38 Gender-based violence, violence against women and children, intimate partner violence, honor  
39 killing, tourist marriage, gender inequities, intersectionality, research ethics, Yemen

## 40 **Introduction**

41 Violence against women and children (VAWC) is a global human rights issue that closely  
42 relates to the achievement of the Sustainable Development Goals (SDGs), particularly  
43 Goal 5, which aims to achieve gender equality and empower all women and girls and  
44 Goal 16, which seeks to promote peaceful and inclusive societies for sustainable  
45 development, provide access to justice for all, and build effective, accountable  
46 institutions. In this systematic review (SR), we summarize primary and secondary  
47 research related to the forms, perpetrators, consequences, and reporting of VAWC in  
48 Yemen to inform future research and the development of interventions that prevent  
49 VAWC in Yemen or address the consequences of VAWC.

## 50 **Humanitarian crisis**

51 In 2023, eighty percent of Yemen's population of 29.8 million people required  
52 humanitarian assistance [1], and 4.5 million people were internally displaced [2], making  
53 Yemen the world's largest humanitarian crisis. The recent war has decimated the  
54 country's economy, healthcare, education, and infrastructure [3]. In addition to the  
55 ongoing humanitarian crisis, Yemen has deeply entrenched gender inequities where  
56 limited resources mean that women and girls do not have the same access to limited  
57 educational, health care, or food resources as their male counterparts [4,5]. As in any

58 humanitarian crisis [6], the prolonged war disproportionately affected Yemeni women  
59 and children.

60 Non-governmental organizations (NGOs) in Yemen report increased levels of forced,  
61 early marriage and trafficking of girls and young children in response to the ongoing war  
62 [7]. Girls are sexually exploited in bars and restaurants in the larger towns of Yemen and  
63 may be forced to traffic illegal drugs [8]. Both Saudi and Houthi forces have used child  
64 soldiers [9]. The economic crisis and targeted attacks on infrastructure, including  
65 education, health care, and government services, mean that child labor has become  
66 commonplace [8], affecting mental and physical health (19). Where school bombings  
67 have not occurred, parents are reluctant to send their children to school for fear of  
68 bombing, trafficking, recruitment of child soldiers, and other forms of community or  
69 war-related violence [10].

## 70 **Violence against women**

71 Intimate partner violence (IPV), defined as “behavior by an intimate partner or ex-  
72 partner that leads to physical, sexual or psychological harm, including aggression, sexual  
73 coercion, psychological abuse, and controlling behaviors” [11], is the most prevalent  
74 form of gender-based violence (GBV) globally. Longstanding gender inequities codified  
75 into law mean that Yemeni women, their families, and their community may perceive  
76 their experience of IPV, including marital rape, as their fault [12]. Societal stigma  
77 associated with physical and sexual violence means that women and children have  
78 limited options for support or for reporting violence. Where support is available, the

79 stigmatization of women or children who experience violence, especially sexual  
80 violence, prevents reporting or accessing available services [13].

### 81 **Violence against children**

82 The World Health Organization (WHO) defines violence against children (VAC) as  
83 “violence in all forms experienced by children who are under 18 years old, perpetrated  
84 by parents or other caregivers, peers, romantic partners, or strangers” [14,15]. Globally,  
85 75% of children experience physical or emotional abuse from their parents, peers, or  
86 caretakers [14,15]. Female genital mutilation or cutting (FGM/C), defined as “all  
87 procedures involving partial or total removal of the external female genitalia or other  
88 intentional injuries to the female genital organs for non-medical reasons,” [16] is a  
89 prevalent cultural practice in Yemen and elsewhere in the Middle East and North Africa  
90 (MENA) and sub-Saharan Africa (SSA) [17]. The practice of FGM/C leads to an increase in  
91 urinary, vaginal, and pregnancy-related morbidities and mortalities, repeat surgeries,  
92 and death [12].

### 93 ***Gender inequitable access to food, education, employment, health care, and legal*** 94 ***protections***

95 In 2021, Yemen ranked last out of 170 countries on the Gender Inequality Index (GII)  
96 [18]. Educational attainment and literacy in Yemen are low (8, 10), especially for women  
97 and only 6% of women work outside of their home [5]. Yemen has two legal systems,  
98 *Shari’a* and *Kabeelee*, or tribal law. Under *Shari’a* law, Yemeni women lack child custody

99 protections and have limited to no right to divorce, property rights, or the right to  
100 manage their finances [19]. In contrast, men are legally entitled to control their spouse’s  
101 money and property, are the default recipients of child custody, and can divorce their  
102 wives by saying “talaq” [19]. Marital rape remains non-criminalized [20] even though  
103 Yemen acceded to the Convention on the Elimination of All Forms of Discrimination  
104 Against Women (CEDAW) in 1984, mandating states to ensure that marriage is founded  
105 on free and full consent [21]. Yemen does not have a minimum age of marriage, even  
106 though Yemen ratified the Convention on the Rights of the Child in 1989, setting 18 as  
107 the minimum age for marriage.

#### 108 ***Intersectionality and violence against women and children***

109 Minority ethnic groups in Yemen, including the indigenous *Akhdam* or *Muhamasheen*  
110 community and refugees from Somalia, Sudan, or Ethiopia, face high levels of  
111 discrimination and violence in Yemen, including sexual assault and rape [22].  
112 Homosexuality in Yemen is a criminal offence under *Shari’a* law that is punishable by  
113 death, which means that violence against lesbian, gay, bisexual, transgender, queer, and  
114 intersex (LGBTQI) likely goes unreported [22].

#### 115 **Materials and Methods**

116 We used a mixed-methods SR design with a narrative synthesis approach to provide a  
117 broad overview of VAWC that could be used to inform policymakers and develop  
118 research priorities [23]. The SR protocol was developed using the 2015 Preferred

119 Reporting Items for Systematic Reviews and Meta-Analyses Protocols (PRISMA-P)  
120 guidelines [24] and registered on the PROSPERO Register of Systematic Reviews before  
121 initiating the search (CRD42021237855). We followed the 2020 PRISMA guidelines for  
122 conducting and reporting systematic reviews [25] and reported the PRISMA elements in  
123 Supplementary Table S1.

#### 124 **Search strategy**

125 We conducted a systematic search of four electronic databases, Ovid (MEDLINE) and  
126 (Embase), Cumulated Index to Nursing and Allied Health Literature (CINAHL), and Web  
127 of Science (WoS), using a combination of MeSH and text terms (S2 Table). We ran the  
128 searches on 18 February 2021 and did not include language or date restrictions. We  
129 updated the search for Ovid (Medline), WoS, and CINAHL on 8 April 2024 but no longer  
130 had access to Ovid (Embase) and did not rerun that search. We also searched for  
131 additional citations using backward snowball sampling [26], reviewing the citations in  
132 included studies. Additional studies were identified through grey literature searches,  
133 using the Google search engine and reviewing NGO websites, including the United  
134 Nations High Commissioner for Refugees (UNHCR), Save the Children, United Nations  
135 Children's Fund (UNICEF), and United Nations Family Planning Association (UNFPA)  
136 websites. We also reviewed Yemen country reports from the Demographic and Health  
137 Surveys (DHS) and the Multi-Cluster Indicator Surveys (MICS), population-representative  
138 survey research initiatives that focus on maternal and child health (MCH)-related  
139 outcomes.

140 ***Inclusion criteria***

141 Included studies were primary research studies that used any design and that reported  
142 on any form of sexual, physical, emotional, or economic violence against Yemeni women  
143 and children, including IPV and family violence (early or very early marriage or forced  
144 marriage, femicide, prenatal sex selection, female infanticide, FGM/C, gendered access  
145 to food, education, vaccines, healthcare, employment; dowry-related violence; honor  
146 killings; child labor; child neglect and maltreatment) workplace violence; war-related  
147 violence (child soldiers, captivity, trafficking of women and children, war-related sexual  
148 violence, physical attacks on women and children (e.g., rape, bombing), indirect attacks  
149 (bombing of water treatment facilities, hospitals, schools); pandemic-related violence  
150 (child labor, increased family, or IPV), violence related to displacement, gendered access  
151 to masks or COVID-19 treatments or vaccines. Studies that did not report on VAWC in  
152 Yemen and publications that did not represent primary research or secondary analyses  
153 of participant-level data (e.g., commentaries, systematic reviews, editorials) were  
154 excluded.

155 **Data extraction and management**

156 Citations were exported to EndNote (version 9.3.3) for deduplication using the Braner  
157 approach [27]. Citations were then exported to Covidence version 2.0 [28] for title-  
158 abstract and full-text screening and data extraction using a pre-piloted data extraction  
159 form (Supplementary Text 5). Three reviewers (SC, MAL, SS) independently conducted  
160 the screening and data extraction. A fourth reviewer (LM) resolved disagreements. A



161 meta-analysis was not possible due to the heterogeneity of study designs, types of  
162 violence, and age groups. We used thematic synthesis [29] to summarize findings across  
163 studies. We treated different types of violence as themes and identified additional  
164 themes, including risk factors, perpetrators, resources, and barriers to accessing  
165 resources, from the included studies and our review of related literature.

## 166 **Quality assessment**

167 We assessed the quality of included primary research studies using the Mixed Method  
168 Analysis Tool (MMAT), version 2018 [30], which reviews the study's design, sampling  
169 strategy, generalizability, data collection methods, integrity of intervention (where  
170 applicable), and analytic approach. We did not review the quality of population-level  
171 surveys (e.g., MICS, DHS, Arab Family Survey), which are generally regarded as high  
172 quality. Quality assessment criteria were applied by two independent reviewers (SS,  
173 MN); disagreements were resolved through a third reviewer (LM).

## 174 **Results**

175 The screening process is summarized in the PRISMA Flow diagram [25] shown in Figure  
176 1. From the initial search of the database conducted in February 2021, we identified 459  
177 abstracts, while in the updated search done in April 2024, 106 abstracts were identified.  
178 After removing duplicates, 356 titles and abstracts (291 from the initial search and 65  
179 from the updated search) were reviewed in Covidence. Subsequently, 63 studies were  
180 assessed for full-text eligibility, with 32 studies excluded for being systematic reviews,

181 commentaries, editorials, or other non-primary research (19 studies) or for not  
182 measuring violence or stigma against Yemeni women and children (13 studies). Data  
183 was extracted from the 31 studies (6 reports and 25 articles(2 of which are grey  
184 literature sources)) that met the inclusion criteria. For details on the reasons for  
185 exclusion at the full-text review stage, refer to Supplementary Table S3.

## 186 **Overview of included studies**

187 Table 1 provides an overview of the types of violence, risk factors, and consequences  
188 examined in the included studies, excluding data from the Yemen DHS and MICS reports  
189 (n=4) as they were included in other studies in the table. We identified 17 primary  
190 research studies, six reports, and eight secondary analyses that met the study inclusion  
191 criteria. Studies and reports included a diversity of age groups and types of violence and  
192 covered all of Yemen's 22 governorates. Primary research included four qualitative  
193 studies and two qualitative components of mixed-method studies [7,21,31–34]. Most  
194 qualitative studies conducted in-depth interviews (IDIs; N=3), one study used a focus  
195 group discussion (FGD) approach [21], and two studies analyzed answers to open-ended  
196 questions in a cross-sectional questionnaire [32,34]. Supplementary Table S4 provides a  
197 detailed overview of quantitative studies and the quantitative estimates in mixed  
198 studies, including types of violence, measurement approach, point estimates (e.g.,  
199 prevalence), measures of uncertainty (if any), associated risk factors, and regional  
200 differences. All 20 quantitative studies employed a cross-sectional design. Four  
201 quantitative studies [16,35–37] used DHS data [12,38,39]. Two studies [36,40] used data

202 from MICSs [41], and five studies used data from various national and sub-national  
203 household surveys conducted in Yemen [42–46].

204

205 Studies included different types of VAWC, offenders or perpetrators of violence,  
206 location of violence, risk factors, consequences of violence, and information on ethical  
207 concerns, access to services, or safety planning. We identified two studies related to  
208 early child marriage [7,21], seven studies on child abuse or maltreatment [21,40,47–51],  
209 five studies on FGM/C [16,36,43,44,46], seven studies on gender differences in  
210 education or health care services [35,37,42,45,52–54], and one study on community  
211 violence [31], IPV [32], attitudes towards honor violence [21], GBV [33], gender  
212 preference [37], dentist’s reports of suspected violence [55], and stigmatizing attitudes  
213 towards women with human immunodeficiency virus (HIV) [56]. No studies presented  
214 information on pandemic or war-related VAWC.

215

216 All studies reported on risk factors and perpetrators, and most studies described  
217 barriers to reporting violence [7,16,31–34,36,40,42–44,47–53,55,57]. Other than the  
218 DHS and MICS, which are country-wide, studies that collected primary data were  
219 conducted in Aden, Sana’a, Al Hudaydah, Taiz, Al-Mukalla, Al-Mahrah, Lahij, and  
220 Hadramout governorates. Most studies included both urban and rural areas, although a  
221 few studies were limited to urban (N=2) [49,54] or rural (N=1) [44] populations. In most  
222 studies, verbal consent, as opposed to written consent, was obtained. This practice

223 could be attributed to concerns about participant safety in research related to VAWC or  
224 to Yemen's generally low literacy level. Over half of the studies (25 of 31) were  
225 conducted before the 2014 war. While most VAWC occurs within the home, three  
226 articles found that women were also likely to experience GBV outside the home [32–  
227 34].

## 228 **Types of VAWC**

### 229 *Family and intimate partner violence against women*

230 Neither the DHS from 1991/92, 1997, or 2013 nor the 2005/6 MICS included questions  
231 on women's experience of partner or family violence. In addition to the DHS and MICS,  
232 two quantitative studies examined IPV [21,32]. One 2002 study of a stratified random  
233 sample of 111 ever-partnered women aged 15-55 in two areas of Sana'a found that  
234 55% of women had experienced physical IPV (beatings, confinement to home, torture),  
235 51% experienced threats, and 17% experienced sexual IPV [32]. Participants also  
236 reported experiencing violence perpetrated by their sons, brothers, fathers, mothers,  
237 and uncles [32]. Many participants reported that the violence they experienced was  
238 "normal" and expected given societal norms [32]. Honor violence often occurs as a  
239 punitive response to perceived sexual immodesty in young girls, including after cases  
240 of sexual violence where the attribution of blame lies with the victim [21]. A 2009  
241 qualitative study found that teenage girls in Yemen internalized honor violence.  
242 Participants reported acceptance of harsh punishments for girls who experienced  
243 sexual violence because they had 'allowed' or invited the violence [21].

244 ***Early and very early child marriage***

245 The 1991/92 DHS revealed that 31% of girls were married by the age of 15 [38], a  
246 figure that decreased to 29% in the 1997 DHS [39] and further dropped to 14% in the  
247 2006 MICS [41], and significantly decreased to 3% in the 2013 DHS [12]. A 2009 focus  
248 group study involving 138 Yemeni girls aged 12 to 18 discovered that financially  
249 insecure families felt compelled to marry off their young daughters [21].

250 “First, I got married at 11, and second, my maternal uncle married me off. He  
251 found the groom through his connections, and he was 50 years old. It was a  
252 marriage of avarice. My uncle got a bribe of 200,000 rials, and my father got  
253 160,000 in money and 300,000 in gold (dowry)....On the day of my marriage, I  
254 still had not reached puberty, and I reached puberty only in his house. He had  
255 intercourse with me on the first night, and of course, I did not know what a  
256 man does to a woman or how to act...my feelings on that night were horrible. I  
257 thought he was going to kill me, and he took me by force. I tried to defend  
258 myself that night, and I could not and then I fainted and lost consciousness and  
259 recovered only in the morning, and he left me alone to get rest.” (p. 462-463,  
260 [21]).

261 ***Tourist marriage***

262 Tourist marriage, a recent manifestation of child marriage, involves a temporary union  
263 between a Yemeni girl and a man from a wealthy Gulf country. This phenomenon has

264 arisen in response to the ongoing humanitarian crisis in Yemen stemming from the  
265 2014 war. Tourist marriages can last from one day to several months and represent a  
266 temporary agreement rather than a legal marriage [7,21]. In a qualitative study  
267 involving stakeholders at NGOs focused on working and helping Yemeni women and  
268 children in crisis, a participant highlighted poverty as the primary factor contributing to  
269 the increasing incidence of this emerging form of child marriage [7].

270 “Poverty, economic hardship, unemployment and increasing cost of living were  
271 all raised as reasons for families to resort to child marriage as a coping  
272 mechanism to permit them to alleviate poverty or the burdens of a large family  
273 with many daughters. Girls from low-income families are more likely to marry  
274 before 18” (p. 9, [7]).

### 275 ***Female genital mutilation and cutting***

276 Five cross-sectional studies measured FGM/C, defined as “all procedures involving  
277 partial or total removal of the external female genitalia or other intentional injuries to  
278 the female genital organs for non-medical reasons” [16,36,43,44,46]. Three studies  
279 assessed both women’s and their husbands’ attitudes toward FGM/C [16,44,46].  
280 Estimates of the prevalence of FGM/C ranged from 16% in a 2008 subnational survey  
281 [44] and the 2013 DHS [12] to around 20% in the 1997 DHS [39] and the 2003 Arab  
282 Family Health Survey [43] and 89% in a population-representative FGM/C-specific  
283 survey in three southern Yemeni governorates [46]. Traditional birth attendants called  
284 *daya, gedah, kharshofa, or qabila* conducted FGM/C at home or in the community

285 [16,44,46]. While some studies found maternal education and knowledge of the harms  
286 of FGM/C was predictive of their daughter’s likelihood of experiencing FGM/C [16,44],  
287 other studies did not [46].

### 288 ***Gender preference***

289 The 1991/92 and 1997 DHS found that 20% and 33% of ever-married women preferred  
290 having a male over a female child [38,39]. In one qualitative study where 220 women  
291 aged <25 to >35 in Aden, Lahij, Hadramaut, Taiz, and Al Hudaydah governorates were  
292 asked about their gender preferences, respondents reported that they “pray to God”  
293 for a boy and not a girl child to make their husband happy [34].

294 “I had nine daughters; my husband wants a son. I was so frightened, it’s a girl  
295 that I started a fever and was shivering from fright.” (pregnant woman, aged  
296 33, urban residence) (p. 7, [34])

297 “My husband is only waiting to hear the good news that the baby is a boy; he  
298 never thinks of me, only the gender of the baby, and I feel very badly.” (woman  
299 with three living children, aged 22, rural residence) (p. 7, [34])

### 300 ***Gender inequitable access to food, medical care, and education***

301 Six studies described gender inequities in access to food, medical services, or  
302 education using data from qualitative studies [42,52–54], the DHS [35], the Pan Arab  
303 Project for Family Health (PAPFAM) [42], and the 2016 Household Income, Expenditure  
304 and Consumption Surveys (HIECS) [45]. A cross-sectional quantitative study on

305 gendered access to education with 8–15-year-olds in 20 Yemeni districts found that  
306 over 30% of girls were not able or allowed to attend school, compared to 10% of boys  
307 [42]. A cross-sectional, multi-country survey on gendered access to medical care,  
308 found that Yemeni boys exhibited a higher likelihood of seeking or receiving hospital  
309 care compared to girls (prevalence sex ratio 0.85;  $p < 0.05$ ) [35]. A statistically  
310 significant proportion of women (3.66 on a scale of 1 to 5;  $p < 0.001$ ) reported feeling  
311 guilty for accessing medical services and were less likely than their male counterparts  
312 to spend money on medical care [53]. A 2005 cross-sectional study on gender and  
313 literacy as determinants of care-seeking behavior found that 63% of low-literacy  
314 women delayed diagnosis of tuberculosis (TB) (longer than eight weeks) compared to  
315 44% of fully literate women [52]. In a 2007 study, most women (69%) reported having  
316 been harmed by family members when seeking medical care within the formal health  
317 system [53]. The two cross-sectional surveys mentioned above also found that women  
318 must seek permission from their husbands or male family members before visiting a  
319 doctor or clinic [52,53].

### 320 ***Child abuse or maltreatment***

321 Seven studies measured violence against children (VAC) at home or in school, including  
322 emotional, physical, and sexual abuse [33,40,47–51]. The majority of the studies were  
323 cross-sectional. Four studies conducted interviews with children to gather information  
324 about their own experiences of abuse [21,47,48,51]. Two studies analyzed caregiver  
325 (mothers, aunts, grandmothers, guardians, teachers) reports of child abuse, either



326 abuse that they had witnessed or been told about [40,50]. One study examined MICS  
327 data to determine the different forms of child abuse and related risk factors [40]. A  
328 high level (around 80%) of adults reported experiencing emotional abuse in their  
329 childhood across studies [40,47,49–51]. The 2013 DHS reported that 42% of children  
330 aged 2-14 (n=5,731) were exposed to severe physical punishment (being hit on the  
331 head or face with hands or by an implement) in the month before the survey. Nearly  
332 80% (n=10,774) faced some form of physical discipline in the same timeframe [12]. The  
333 2006 MICS reported that 94% of children aged 2-14 (n=2,702) were ever exposed to at  
334 least one form of physical or psychological abuse, and over 20% of children aged 5-14  
335 (n=1,733) were engaged in child labor [41]. Three studies found a high prevalence of  
336 emotional and physical abuse among school children in Sana'a and four randomly  
337 selected districts of Aden [47,48,51]. A 2011 study of the different forms of child  
338 abuse prevalent in Yemen found that more than 90% of children aged 2-14 ever  
339 experienced emotional abuse [40], and a 2019 cross-sectional study found that 35% of  
340 students aged 18-24 reported experience of sexual abuse during their childhood [49].  
341 A 2008 study of a random sample of students aged 7-10 (n=1,196) and another 2019  
342 study with a random sample of students from five colleges at Hadramaut University  
343 (n=395) found shouting, yelling, hitting by hands, severe physical punishments, and  
344 sexual abuse to be commonly experienced by children [49,50]. Close to 60% of the  
345 interviewed mothers (n=119) of school-aged children living in rural areas reported  
346 hitting their children with their hands to discipline them [50]. Thirty-five per cent of  
347 students in one quantitative study (n=139) experienced sexual violence during

348 childhood, defined as being “spoken to in a sexual way, unwanted sexual touching,  
349 forced to watch movies, take naked photos” [49]. Eighty per cent of students  
350 experienced verbal sexual harassment (n=111), and 19% (n=26) were coerced into  
351 watching pornographic movies [49].

## 352 **Perpetrators of violence**

353 Most studies reported child abuse perpetrators as parents or other family members,  
354 teachers, and school principals in schools or universities [40,47–51]. FGM/C practices  
355 were mainly carried out by family, traditional healers, and community members at  
356 home or in health facilities [16,36,43,44]. Both partners and parents perpetrated  
357 honor violence [32].

## 358 **Legal context**

359 Legal protections for women and children facing violence are limited. In cases of sexual  
360 violence against women or girls, families might force their daughters to marry the  
361 perpetrator as a means of restoring the family's honor [7,21]. Divorced women are  
362 often blamed for their divorce [32]. One 2002 qualitative study found that Yemeni  
363 women felt that:

364           'Women have no rights...We are second-class citizens. Nobody listens, nobody  
365           cares, people think this is normal, but it is not normal' (p.343, [32]).

366 In the same study, a participant reported,

367 “I do not believe what I hear from the media about equality between man and  
368 woman in our society. Our society is a men's society. Men decide what is right  
369 and what is wrong, not only in the family but in the whole society. They  
370 interpret the holy Qur'an in harmony with their interest. We know that our  
371 religion (Islam) guarantees many rights for women, but men accept only what  
372 is good for them and do not accept what is not good for them. For example, in  
373 some parts of Yemen, the community does not accept women's inheritance:  
374 this is against Islamic law! This is because they don't accept women as people”  
375 (p.343, [32]).

376 While Yemen is considering a bill that specifies girls should be at least 18 to marry, the  
377 bill has not been passed into law. In addition to country-level legal prohibitions against  
378 child marriage, alternative approaches that leverage Islamic prohibitions against child  
379 marriage are needed [21]. According to a workshop conducted by the Arab Resource  
380 Collective (ARC), early marriages are practiced due to weak laws and the inability to  
381 feed children [21]. The lack of birth or marriage registries makes it challenging to track  
382 the girls' age at marriage [7,21], and the ongoing conflict has set back previous  
383 progress toward reducing child marriage in Yemen.

384 “A boy and a girl can be considered adults, making it difficult for them to  
385 understand that they are marrying children. We managed to include it in the  
386 national dialogue, and we succeeded. But unfortunately, [child marriage] is  
387 now on hold due to conflict” (p. 10, [7]).

388 In a study aiming to gather participant suggestions for mitigating child marriage,  
389 recommendations included providing financial support to families for girls' education,  
390 funding NGOs dedicated to addressing child marriage, raising awareness within  
391 communities about girls' rights, and implementing local interventions as potential  
392 strategies [7].

393 **Table 1.** Overview of included studies

| Author, year of publication | Location (city), governorate, study setting                                                                                                            | Sample                  | Rural or urban location | Study type                                                         | Research question or objective                                                      | Type of violence | Place violence occurs | Perpetrators                                                                                           | Risk factors                                                                                                      | Consequences of violence                                                                                   | Barriers, tools, and strategies for reporting                                                   |
|-----------------------------|--------------------------------------------------------------------------------------------------------------------------------------------------------|-------------------------|-------------------------|--------------------------------------------------------------------|-------------------------------------------------------------------------------------|------------------|-----------------------|--------------------------------------------------------------------------------------------------------|-------------------------------------------------------------------------------------------------------------------|------------------------------------------------------------------------------------------------------------|-------------------------------------------------------------------------------------------------|
| Al-Khulaidi, 2013 [16]      | Aden, Al Hudaydah, Sana'a, Taiz, Hadramaut, Ibb, Dhamar, Al Mahwit, Hajjah, Amran, Sa'dah, Lahij, Al Bayda, Marib, Al Jawf, Shabwah, Al Mahrah, Raymah | 11,528 women aged 15-49 | Both                    | Quantitative (secondary data analysis: Yemen DHS 1997 & 2003 data) | What are the prevailing attitudes of Yemeni women and their husbands towards FGM/C? | FGM/C            | Home, health facility | Family members, society, traditional birth attendants, traditional healers, medical personnel, barbers | Paternal support for or family history of FGM/C; low SES; cultural traditions; low level of maternal education    | Septicemia; death; obstructed or prolonged labor, severe postpartum bleeding; post-pregnancy complications | Lack of awareness of FGM/C; stigma associated with reporting                                    |
| Alosaimi, 2019 [44]         | Alazareq (Dhale), Asabrah & Fara'a Aludain (Ibb), Mookaa & Maoza (Taiz), & Azidiah (Al Hudaydah)                                                       | 4238 women aged 15-49   | Rural                   | Quantitative (secondary data analysis: HBMNC 2008-2009)            | What are the factors associated with FGM/C in Yemen?                                | FGM/C            | Home                  | Family members, traditional healers                                                                    | Low SES or level of maternal education; mother's FGM/C experience; cultural norms; child marriage; <i>qat</i> use | Risk of neonatal death and low infant birth weight; sexual, mental, and social consequences for women      | Poor implementation of laws against FGM/C; cultural norms, including FGM/C as a requirement for |

| Author, year of publication | Location (city), governorate, study setting    | Sample                                                     | Rural or urban location | Study type                                   | Research question or objective                                                          | Type of violence | Place violence occurs | Perpetrators                        | Risk factors                                                                                                                         | Consequences of violence                        | Barriers, tools, and strategies for reporting |
|-----------------------------|------------------------------------------------|------------------------------------------------------------|-------------------------|----------------------------------------------|-----------------------------------------------------------------------------------------|------------------|-----------------------|-------------------------------------|--------------------------------------------------------------------------------------------------------------------------------------|-------------------------------------------------|-----------------------------------------------|
|                             |                                                |                                                            |                         |                                              |                                                                                         |                  |                       |                                     |                                                                                                                                      |                                                 | marriage and family honor                     |
| Al Taj, 2023 [46]           | Al-Mahrah, Al Hidaydah, Hadramaut governorates | 646 women; 354 men                                         | Both                    | Quantitative (cross-sectional questionnaire) | What are the factors associated with FGM/C in Yemen?                                    | FGM/C            | Home                  | Family members, traditional healers | Maternal age; parental support for or family history of FGM/C; rural residence; low level of paternal education; geographic location | NS                                              | NS                                            |
| Alyahri 2008 [50]           | Mukalla (Hadramout), Turban, (Lahji)           | Caregivers and teachers of 1,196 Yemeni children aged 7–10 | Both                    | Quantitative (cross-sectional questionnaire) | What are the types, determinants, and prevalence of harsh corporal punishment in Yemen? | Child abuse      | Home                  | Family members                      | Rural residency; lower level of maternal education; male gender of the child; more significant number of children in a household     | Poor academic performance; behavioral disorders | Parental acceptance of corporal punishment    |
| Akmatov, 2011 [40]          | 28 LMIC, including Yemen                       | Mothers/caretakers of 2,845 Yemeni                         | Both                    | Quantitative (secondary data)                | What is the prevalence of                                                               | Child abuse      | Home                  | Parents and adult guardians         | Male gender of child; higher                                                                                                         | Poor academic performance;                      | Parental acceptance of corporal               |

| Author, year of publication | Location (city), governorate, study setting | Sample                                     | Rural or urban location | Study type                                               | Research question or objective                                                                                      | Type of violence                    | Place violence occurs | Perpetrators                     | Risk factors                                                                                                                                            | Consequences of violence                         | Barriers, tools, and strategies for reporting                                                                      |
|-----------------------------|---------------------------------------------|--------------------------------------------|-------------------------|----------------------------------------------------------|---------------------------------------------------------------------------------------------------------------------|-------------------------------------|-----------------------|----------------------------------|---------------------------------------------------------------------------------------------------------------------------------------------------------|--------------------------------------------------|--------------------------------------------------------------------------------------------------------------------|
|                             |                                             | children aged 2-14                         |                         | analysis: Yemen MICS 2006)                               | different forms of child abuse and the factors associated with them (countries including Yemen?                     |                                     |                       |                                  | number of household members; low SES; age of the child (younger children face a higher risk); urban residency                                           | mental health disorders; substance abuse         | punishment; parents' denial of abuse; low school enrollment precludes school-based programs to prevent child abuse |
| Assaad, 2019 [45]           | 8 MENA countries, including Yemen           | 19,168 Yemeni children aged 12-18          | Both                    | Quantitative (secondary data analysis: Yemen HIECS 2006) | What is the relationship between the educational attainment of MENA youth and the circumstances they are born into? | Gendered access to education        | Home, Community       | Government, communities, parents | Prioritization of the education of male versus female children in both urban and rural households; rural residency; lack of parental education; low SES | Gender gap in education attainment               | NS                                                                                                                 |
| Badahdah, 2016 [56]         | Yemen                                       | 613 male and female undergraduate students | NS                      | Quantitative (cross-sectional questionnaire)             | What are the attitudes of young adults in Yemen                                                                     | Stigmatizing attitudes towards WLWH | Community, country    | Community members                | Men were more likely than women to stigmatize PLWH and                                                                                                  | WLWH face increased prejudice and discrimination | NA                                                                                                                 |

| Author, year of publication | Location (city), governorate, study setting | Sample                                                           | Rural or urban location | Study type                                   | Research question or objective                                                                  | Type of violence              | Place violence occurs | Perpetrators                                                                                  | Risk factors                                                                                                                                                                   | Consequences of violence                                                                                                                               | Barriers, tools, and strategies for reporting                                                                                   |
|-----------------------------|---------------------------------------------|------------------------------------------------------------------|-------------------------|----------------------------------------------|-------------------------------------------------------------------------------------------------|-------------------------------|-----------------------|-----------------------------------------------------------------------------------------------|--------------------------------------------------------------------------------------------------------------------------------------------------------------------------------|--------------------------------------------------------------------------------------------------------------------------------------------------------|---------------------------------------------------------------------------------------------------------------------------------|
|                             |                                             | from a public university                                         |                         |                                              | towards the sexual and reproductive rights of WLWH?                                             |                               |                       |                                                                                               | support restrictions to SRHR of WLWH.                                                                                                                                          | tion compared to men living with HIV. Restrictions to SRHR of WLWH is widely supported.                                                                |                                                                                                                                 |
| Bamatraf, 2019 [49]         | Al-Mukalla city                             | 395 students from Hadramaut University (academic year 2015-2016) | Urban                   | Quantitative (cross-sectional questionnaire) | What are the prevalence and risk factors of various forms of child abuse faced by Yemeni youth? | Child abuse                   | Home, schools, public | Parents, friends, neighbors, teachers, drivers, strangers, relatives (uncles, aunts, cousins, | Male gender of the child (who face a higher risk of physical, emotional, and sexual abuse); history of violence in the family; existence of mental health issues among parents | Poor academic performance; mental health issues including anxiety, depression, nightmares, suicidal tendencies, violent behavior, and revenge ideation | Cultural and societal acceptance of harsh or corporal disciplining of children; poor implementation of laws against child abuse |
| Ba-Saddik, 2012 [47]        | 4 districts in Aden                         | 1066 students, aged 12-17, from 8 schools                        | NS                      | Quantitative (cross-sectional questionnaire) | What is the prevalence of emotional abuse                                                       | Child abuse (Emotional abuse) | Schools               | Teachers and other school administrative staff                                                | Male gender of the child; cultural acceptance of                                                                                                                               | Poor academic performance; adverse impacts                                                                                                             | Cultural acceptance of emotional abuse in school                                                                                |



| Author, year of publication | Location (city), governorate, study setting | Sample                                    | Rural or urban location | Study type                                   | Research question or objective                                                                     | Type of violence             | Place violence occurs | Perpetrators                                   | Risk factors                                                                                                                                                                                 | Consequences of violence                                                                                              | Barriers, tools, and strategies for reporting          |
|-----------------------------|---------------------------------------------|-------------------------------------------|-------------------------|----------------------------------------------|----------------------------------------------------------------------------------------------------|------------------------------|-----------------------|------------------------------------------------|----------------------------------------------------------------------------------------------------------------------------------------------------------------------------------------------|-----------------------------------------------------------------------------------------------------------------------|--------------------------------------------------------|
|                             |                                             |                                           |                         |                                              | faced by Yemeni students and the associated risk factors?                                          |                              |                       |                                                | emotional abuse tactics in classrooms ; age of the student (older students face a higher risk); higher number of household members; lower levels of parental (especially paternal) education | on cognitive, emotional, and physical health                                                                          |                                                        |
| Ba-Saddik, 2013 [48]        | 4 districts in Aden                         | 1066 students, aged 12-17, from 8 schools | NS                      | Quantitative (cross-sectional questionnaire) | What is the prevalence of physical abuse faced by Yemeni students and the associated risk factors? | Child abuse (Physical abuse) | Schools               | Teachers and other school administrative staff | Male gender of the child; social acceptance of classroom corporal punishment; student age (older students face a higher risk);                                                               | Poor academic performance; mental health issues; criminal behavior; social isolation; substance abuse; obesity; risky | Social acceptance of corporal punishment in classrooms |

| Author, year of publication | Location (city), governorate, study setting | Sample                                                  | Rural or urban location | Study type                                                  | Research question or objective                                                   | Type of violence                                  | Place violence occurs              | Perpetrators                          | Risk factors                                                                                                                                                   | Consequences of violence                                                      | Barriers, tools, and strategies for reporting   |
|-----------------------------|---------------------------------------------|---------------------------------------------------------|-------------------------|-------------------------------------------------------------|----------------------------------------------------------------------------------|---------------------------------------------------|------------------------------------|---------------------------------------|----------------------------------------------------------------------------------------------------------------------------------------------------------------|-------------------------------------------------------------------------------|-------------------------------------------------|
|                             |                                             |                                                         |                         |                                                             |                                                                                  |                                                   |                                    |                                       | higher number of household members; lower levels of paternal education                                                                                         | sexual behaviors                                                              |                                                 |
| Chamberlain, 2007 [53]      | Yemen, Uganda, Canada                       | 100 Yemeni women aged 15-45                             | NS                      | Quantitative (cross-sectional questionnaire)                | What are Yemeni women's perceptions of self-worth concerning healthcare-seeking? | Gender inequity in healthcare access              | Communities, healthcare facilities | Government, family members, community | Low perception of self-worth and self-value; lower levels of education; low decision-making power and financial autonomy; lack of knowledge of personal rights | Higher maternal mortality rates and related adverse health outcomes for women | Gender-inequitable norms and practices; poverty |
| Costa, 2017 [35]            | Yemen & other LMICs                         | Mothers or caretakers of 15,383 Yemeni children under 5 | NS                      | Quantitative (secondary data analysis: Yemen DHS 2013 data) | Is there a gender bias in the access to medical interventions for children?      | Gender inequity in healthcare access for children | Home, community                    | Family members, community             | Female gender of the child; - preferential care-seeking for boys found in the Muslim community                                                                 | Poor health outcomes for female children                                      | NS                                              |

| Author, year of publication | Location (city), governorate, study setting | Sample                                              | Rural or urban location | Study type                                   | Research question or objective                                                                                        | Type of violence                                                       | Place violence occurs | Perpetrators | Risk factors                                                                                                                                                                                                       | Consequences of violence                               | Barriers, tools, and strategies for reporting                                       |
|-----------------------------|---------------------------------------------|-----------------------------------------------------|-------------------------|----------------------------------------------|-----------------------------------------------------------------------------------------------------------------------|------------------------------------------------------------------------|-----------------------|--------------|--------------------------------------------------------------------------------------------------------------------------------------------------------------------------------------------------------------------|--------------------------------------------------------|-------------------------------------------------------------------------------------|
|                             |                                             |                                                     |                         |                                              |                                                                                                                       |                                                                        |                       |              | y                                                                                                                                                                                                                  |                                                        |                                                                                     |
| Date, 2005 [52]             | Sana'a                                      | 173 patients at the National Tuberculosis Institute | NS                      | Quantitative (cross-sectional questionnaire) | How do gender and literacy affect diagnosis and treatment of TB cases in Yemen?                                       | Gender inequity and illiteracy affecting healthcare access             | NS                    | NS           | Low literacy related to diagnostic delay; men less likely than women to complete treatment                                                                                                                         | Delay in diagnosis; inadequate or incomplete treatment | Absence of family support for men with TB during their treatment compared to women. |
| El Tantawi, 2018 [55]       | 8 Arab countries, including Yemen           | 291 Yemeni dentists                                 | NS                      | Quantitative (cross-sectional questionnaire) | Are dentists in Arab countries likely to report suspected exposure to violence in patients, and what influences this? | Intention to report on interpersonal violence (e.g., IPV, child abuse) | Home, community       | NS           | Lack of awareness that reporting violence is mandated by law; inability of dentists to identify victims of violence; shifting responsibility to protective services; female dentists less likely to plan to report | Victims of violence do not receive services.           | NS                                                                                  |
| Liang, 2016 [36]            | 23 African & 6 Arab countries,              | Yemeni women aged 15-                               | NS                      | Quantitative (secondary)                     | What are the current                                                                                                  | FGM/C                                                                  | Community             | NS           | High adolescent fertility                                                                                                                                                                                          | High maternal mortality                                | NS                                                                                  |

| Author, year of publication | Location (city), governorate, study setting                       | Sample                                                    | Rural or urban location | Study type                                             | Research question or objective                                                                                | Type of violence                                                         | Place violence occurs    | Perpetrators   | Risk factors                                                                                                              | Consequences of violence                                                                  | Barriers, tools, and strategies for reporting    |
|-----------------------------|-------------------------------------------------------------------|-----------------------------------------------------------|-------------------------|--------------------------------------------------------|---------------------------------------------------------------------------------------------------------------|--------------------------------------------------------------------------|--------------------------|----------------|---------------------------------------------------------------------------------------------------------------------------|-------------------------------------------------------------------------------------------|--------------------------------------------------|
|                             | including Yemen                                                   | 49                                                        |                         | y data analysis: DHS and MICS data)                    | levels and observable trends in FGM/C prevalence?                                                             |                                                                          |                          |                | rates; rural residency; mother's experience of child marriage; acceptance of VAW; low maternal education level; lower SES | rate; higher prevalence of FGM/C; gender inequalities                                     |                                                  |
| Sharaf, 2019 [37]           | Egypt, Jordan, Yemen                                              | Mothers/caretakers aged 15-49 of 13,624 children aged 0-5 | Both                    | Quantitative (secondary data analysis: Yemen DHS 2013) | Is there a gender bias present in child nutritional status and is there an association with a son preference? | Gender discrimination in childbearing preferences and nutritional status | NS                       | NS             | NS                                                                                                                        | NS                                                                                        | NS                                               |
| Smits, 2013 [42]            | 6 Arab countries (including Yemen: 20 districts and 649 clusters) | Yemeni mothers (aged 16-49) of children aged 8-15         | Both                    | Quantitative (secondary data analysis: PAPFAM, 2003)   | What are the determinants of educational participation and gender differences in                              | Gender inequity in education participation                               | Home, schools, community | Family members | Rural residency; lower levels of parental education; higher number of siblings (especially brothers);                     | Higher infant/child mortality; higher fertility in women; early marriage; higher rates of | Gender inequitable norms and access to education |

| Author, year of publication | Location (city), governorate, study setting | Sample                                                   | Rural or urban location | Study type                                             | Research question or objective                                                                                | Type of violence                           | Place violence occurs                  | Perpetrators                                                          | Risk factors                                                                                                                | Consequences of violence                                   | Barriers, tools, and strategies for reporting                         |
|-----------------------------|---------------------------------------------|----------------------------------------------------------|-------------------------|--------------------------------------------------------|---------------------------------------------------------------------------------------------------------------|--------------------------------------------|----------------------------------------|-----------------------------------------------------------------------|-----------------------------------------------------------------------------------------------------------------------------|------------------------------------------------------------|-----------------------------------------------------------------------|
|                             |                                             |                                                          |                         |                                                        | education for young children in six Arab countries?                                                           |                                            |                                        |                                                                       | having a working mother or no mother at home; cultural norms; occupation of the father being farming-related; household SES | malnutrition and poverty                                   |                                                                       |
| Yoder, 2013 [43]            | 27 African countries, including Yemen       | 4,250,558 Yemeni women aged 15-49                        | Both                    | Quantitative (secondary data analysis: Yemen FHS 2003) | What is the estimate of the number of women who have undergone FGM/C and of girls who will eventually be cut? | FGM/C                                      | Home, healthcare facilities, community | Family members, modern or traditional health practitioners, community | Older age of woman associated with higher prevalence of FGM/C                                                               | Harmful effect on girl's health; violation of human rights | Poor implementation of laws against FGM/C; lack of awareness of FGM/C |
| Alansari, 2006 [54]         | 17 Islamic countries, including Yemen       | 648 University of Aden undergraduate students aged 18-25 | Urban                   | Quantitative (cross-sectional questionnaire)           | Is there a gender difference in the prevalence of depression among                                            | Gender differences in mental health issues | NS                                     | NS                                                                    | NS                                                                                                                          | NS                                                         | NS                                                                    |

| Author, year of publication | Location (city), governorate, study setting                         | Sample                  | Rural or urban location | Study type                                                                                                  | Research question or objective                               | Type of violence      | Place violence occurs | Perpetrators                                 | Risk factors                                                 | Consequences of violence                                        | Barriers, tools, and strategies for reporting                                                                                                                                                                                   |
|-----------------------------|---------------------------------------------------------------------|-------------------------|-------------------------|-------------------------------------------------------------------------------------------------------------|--------------------------------------------------------------|-----------------------|-----------------------|----------------------------------------------|--------------------------------------------------------------|-----------------------------------------------------------------|---------------------------------------------------------------------------------------------------------------------------------------------------------------------------------------------------------------------------------|
|                             |                                                                     |                         |                         |                                                                                                             | undergraduate students?                                      |                       |                       |                                              |                                                              |                                                                 |                                                                                                                                                                                                                                 |
| Ba-Obaid, 2002 [32]         | Sana'a (Hadda, al-Hay al-Siyasi, Shari'a Taiz, Nuqum, Bab al-Yemen) | 111 women aged 15-55    | NS                      | Mixed methods (cross-sectional questionnaire with closed and open-ended questions; secondary data analysis) | What are the kinds of violence that Yemeni women experience? | DV; societal violence | Home                  | Male relatives, community members, strangers | Gender inequitable norms and laws; early age of marriage     | Adverse physical and emotional consequences                     | Police stations primarily staffed by men and requirement that women be accompanied by a male relative prevents reporting; societal acceptance of VAWG; traditional laws stipulate family should resolve intermarital conflicts. |
| Alizzy, 2017 [51]           | Sana'a                                                              | 598 students aged 11-16 | NS                      | Quantitative (cross-sectional questionnaire)                                                                | What is the association (including gender) between           | Child abuse           | Home                  | Family members                               | Lower SES; older, male children face a higher risk of abuse; | Exposure to family violence can cause anxiety, depression (more | Cultural norms that normalize VAWG; stigma associated                                                                                                                                                                           |

| Author, year of publication | Location (city), governorate, study setting | Sample             | Rural or urban location | Study type                                  | Research question or objective                                                          | Type of violence   | Place violence occurs                     | Perpetrators                                           | Risk factors                                                                                                                                                                                                     | Consequences of violence                                                                       | Barriers, tools, and strategies for reporting               |
|-----------------------------|---------------------------------------------|--------------------|-------------------------|---------------------------------------------|-----------------------------------------------------------------------------------------|--------------------|-------------------------------------------|--------------------------------------------------------|------------------------------------------------------------------------------------------------------------------------------------------------------------------------------------------------------------------|------------------------------------------------------------------------------------------------|-------------------------------------------------------------|
|                             |                                             |                    |                         |                                             | family violence and internalizing and externalizing problems in Yemeni children?        |                    |                                           |                                                        | cultural acceptance and normalization of corporal punishment; gender inequitable norms; societal acceptance of VAWG                                                                                              | common in female children) & hostility and aggressive behaviors (more common in male children) | with reporting                                              |
| Kempe, 2015 [34]            | Aden, Lahij, Hadramout, Taiz, Al Hidaydah   | 220 Yemeni mothers | Both                    | Qualitative (cross-sectional questionnaire) | What are the prevalence rates and causal factors of fear of childbirth in Yemeni women? | Fear of childbirth | Home, modern health facilities, community | Family members, modern health practitioners, community | Fear from previous childbirth trauma and pregnancy loss; fear from negative childbirth accounts shared by surrounding women; lack of fertility control, early marriage; son preference; poor marital relationshi | Psychological stress; adverse maternal outcomes; impaired maternal-infant interaction          | Limited awareness or access to human rights, including SRHR |

| Author, year of publication | Location (city), governorate, study setting | Sample                        | Rural or urban location | Study type                                    | Research question or objective                                                                                                         | Type of violence                             | Place violence occurs | Perpetrators                                                                 | Risk factors                                                                                                                                         | Consequences of violence                                                                                                           | Barriers, tools, and strategies for reporting                                                                           |
|-----------------------------|---------------------------------------------|-------------------------------|-------------------------|-----------------------------------------------|----------------------------------------------------------------------------------------------------------------------------------------|----------------------------------------------|-----------------------|------------------------------------------------------------------------------|------------------------------------------------------------------------------------------------------------------------------------------------------|------------------------------------------------------------------------------------------------------------------------------------|-------------------------------------------------------------------------------------------------------------------------|
|                             |                                             |                               |                         |                                               |                                                                                                                                        |                                              |                       |                                                                              | p; lack of education for girls                                                                                                                       |                                                                                                                                    |                                                                                                                         |
| Ouis, 2009 [21]             | Lebanon, OPT, Yemen                         | 138 teenagers, (aged 12-18)   | NS                      | Qualitative (FGDs, Life history interviewing) | What are the experiences and opinions of young girls regarding honor violence, sexual abuse, and early marriage?                       | Honor violence, early marriage, sexual abuse | Home, community       | Parents or guardians, male relatives, husbands, community members, strangers | Political and economic instability; gender inequitable laws and norms; religious ideals; concerns about family honor; stigmatization of sexual abuse | Prostitution, sexual violence, death, home arrest, forced marriage, stigma                                                         | Fear of reporting abuse due to practice of marrying sexual assault and rape victims to their rapists and honor killings |
| Christiansen, 2019 [31]     | Sana'a, Al Hudaydah, Taiz                   | 16 <i>Muhamseen</i> activists | NS                      | Qualitative (IDIs)                            | How have <i>Muhamseen</i> activists enacted their citizenship, and how do the social status and moral discourse surrounding this group | Socioeconomic and political violence, GBV    | Community, country    | Community members                                                            | Political and social discrimination, low SES of <i>Muhamseen</i> , gendered exclusion due to perceived immodesty of <i>Muhamseen</i>                 | Social exclusion, poverty, lack of legal protection, limited access to education, healthcare, housing jobs limited to handiwork or | Low SES, limited legal protection, intersectional oppression of <i>Muhamseen</i> women                                  |



| Author, year of publication | Location (city), governorate, study setting | Sample                                                                                                                                                                                         | Rural or urban location | Study type                                  | Research question or objective                                                                                           | Type of violence                    | Place violence occurs                      | Perpetrators                                                                  | Risk factors                                                                                                                                                                                                                                     | Consequences of violence                            | Barriers, tools, and strategies for reporting                                |
|-----------------------------|---------------------------------------------|------------------------------------------------------------------------------------------------------------------------------------------------------------------------------------------------|-------------------------|---------------------------------------------|--------------------------------------------------------------------------------------------------------------------------|-------------------------------------|--------------------------------------------|-------------------------------------------------------------------------------|--------------------------------------------------------------------------------------------------------------------------------------------------------------------------------------------------------------------------------------------------|-----------------------------------------------------|------------------------------------------------------------------------------|
|                             |                                             |                                                                                                                                                                                                |                         |                                             | affect this enactment?                                                                                                   |                                     |                                            |                                                                               | women                                                                                                                                                                                                                                            | manual labor, restricted from holding public office |                                                                              |
| Lewis, 2012 [33]            | Yemen                                       | Prominent Yemeni stakeholders from the government and international government organizations and donors, analyst experts on social reform and justice, civilian youth respondents (aged 18-35) | NS                      | Mixed methods (IDI's, theoretical analysis) | What is the relationship between state fragility and violent criminal behavior among children and young people in Yemen? | Youth violence and criminality, GBV | Streets, schools, home, prisons, community | Government ministries, armed and extremist groups, family members, educators, | Lack of welfare services and public safety; poverty; unemployment; exposure to traumatic events, gangs and other armed groups; stigmatization and imprisonment of 'deviant' youth; displacement; poor school attendance; high fertility of young | Smoking, exposure to violence, criminality          | Lack of accessible services or familial support, limited access to education |

| Author, year of publication | Location (city), governorate, study setting | Sample                                        | Rural or urban location | Study type                                    | Research question or objective                                               | Type of violence | Place violence occurs | Perpetrators | Risk factors                                                                                                                                                                                                                                                          | Consequences of violence                               | Barriers, tools, and strategies for reporting                                                                 |
|-----------------------------|---------------------------------------------|-----------------------------------------------|-------------------------|-----------------------------------------------|------------------------------------------------------------------------------|------------------|-----------------------|--------------|-----------------------------------------------------------------------------------------------------------------------------------------------------------------------------------------------------------------------------------------------------------------------|--------------------------------------------------------|---------------------------------------------------------------------------------------------------------------|
|                             |                                             |                                               |                         |                                               |                                                                              |                  |                       |              | girls; limited family support or safe spaces                                                                                                                                                                                                                          |                                                        |                                                                                                               |
| ICRW & UNICEF, 2017 [7]     | Sana'a                                      | 8 respondents from two UN agencies and 6 NGOs | NS                      | Qualitative (IDIs, thematic content analysis) | What is the prevalence of child marriage in Yemen, and what are its drivers? | Child marriage   | Home, community       | Family       | War-related displacement and economic; limited mobility of women and girls; gender inequitable norms and laws; weak NGO service delivery related to limited resources; limited knowledge sharing between different CSOs/donors; lack of awareness of support services | Gendered inequitable access to education and resources | Lack of awareness of support services, gender inequitable norms and laws, limited mobility of women and girls |

394 CSO: civil society organisation; DHS: Demographic Health Survey; DV: domestic violence; FGD: focus group discussions; FGM/C: female genital mutilation/cutting; FV:  
395 family violence; GBV: gender-based violence; HBMNC: Home Based Maternal and Neonatal Care project; HIECS: Household Income, Expenditure and Consumption  
396 Surveys; IDI: in-depth interview; KII: key-informant interview; LMIC: low- and middle-income countries; MENA: Middle East and North Africa; MICS: Multi-indicator  
397 Cluster Survey; NGO: non-governmental organization; OPT: Occupied Palestinian Territories; PLWH: people living with HIV; SES: socioeconomic status; SV: sexual  
398 violence; TB: tuberculosis; UN: United Nations; WLWH: women living with HIV

## 399 **Quality assessment**

400 The quality of primary research studies, excluding population-representative studies like  
401 DHS and MICS, is summarized in Table S5. The quantitative studies on corporal  
402 punishment in schools and experience of child maltreatment and abuse followed similar  
403 well-described study designs and sampling frames [40,47–50], but were small in scale  
404 and not representative. Most of the included qualitative studies had clearly stated  
405 research questions, methods, and findings. However, one article did not specify how the  
406 analysis was coded [33], and neither the research question nor methods were clear in  
407 one article [31].

## 408 **Ethical conduct of VAWC research**

409 We adapted the rubric developed by Peterman, et. al., [58] to assess studies'  
410 compliance with established norms for the ethical conduct of VAWC research, described  
411 in Table 2. Ethical concerns for VAWC research from the DHS and MICS studies is  
412 described elsewhere [59–62]. Studies that asked children or young adults about their  
413 experience of violence at home (N=3; 12,46,48) or in the classroom (N=3; 44–46)  
414 reported ethical clearance, verbal assent from participants, and used paper-based forms  
415 that did not collect identifying information. In two studies, where the participants were  
416 minors, consent was obtained from the parents [47,48]. The two qualitative studies that  
417 interviewed women and girls about their own experience of violence, including sexual  
418 violence, did not mention ethical approval or informed consent [21,32]. One of the

419 studies mentioned that interviewers were trained psychology students and that they  
420 were accompanied by other women for safety purposes [32]. One quantitative study  
421 that interviewed male and female heads of household about their attitudes towards  
422 FGM/C, and in the case of women, their own experience of FGM/C, mentioned  
423 interviewer training, but did not specify what the training consisted of [46]. One  
424 quantitative survey of childhood experience of violence reported that the study team  
425 was trained to recognize any signs of distress exhibited as students completed the  
426 questionnaire [51]. No study mentioned making safety planning, resource lists, or  
427 support services available to participants. In one 2015 study, where female participants  
428 were sometimes accompanied by their husbands or older relatives, a second round of  
429 interviews was conducted when privacy could be ensured [34]. In resource-limited  
430 settings discussing the policy relevance of the findings is especially important to ensure  
431 ethical conduct and impact of future research, but most studies did not address the  
432 policy implications of their work.

433 **Table 2. Ethical conduct of primary VAWC studies**

| Author, year of publication | Population                         | Focus                                  | Ethics, interviewer training, safety planning                                                                                                                                                                        |
|-----------------------------|------------------------------------|----------------------------------------|----------------------------------------------------------------------------------------------------------------------------------------------------------------------------------------------------------------------|
| Al Taj, 2023 [46]           | Male and female heads of household | Prevalence and attitudes towards FGM/C | Ethical review by Sana'a University, multistage random sampling, verbal IC, mentions interviewer training, but not what interviewers were trained in, interviews conducted in subject's home without others present. |
| Bamatraf, 2019 [49]         | University students                | Prevalence and risk factors for        | Ethical review by Hadramaut University School of Medicine, verbal IC, self-completed, anonymous paper                                                                                                                |

| Author, year of publication | Population                | Focus                                                            | Ethics, interviewer training, safety planning                                                                                                                                                                                                                                                                                 |
|-----------------------------|---------------------------|------------------------------------------------------------------|-------------------------------------------------------------------------------------------------------------------------------------------------------------------------------------------------------------------------------------------------------------------------------------------------------------------------------|
|                             |                           | child abuse                                                      | survey using validated instrument, returned in ballot box for anonymity                                                                                                                                                                                                                                                       |
| Ba-Saddik, 2012 [47]        | Secondary school students | Prevalence of and risk factors for emotional abuse in classrooms | Ethical review by Committee of Research and Postgraduate Studies, Faculty of Medicine and Health Sciences, Aden University, written IC from parents, verbal assent from participants, self-completed, anonymous paper survey using validated instrument.                                                                      |
| Ba-Saddik, 2013 [48]        | Secondary school students | Prevalence of and risk factors for physical abuse in classrooms  | Ethical review by Committee of Research and Postgraduate Studies, Faculty of Medicine and Health Sciences, Aden University, Written IC from parents, verbal assent from participants, self-completed, anonymous paper survey using validated instrument.                                                                      |
| Ba-Obaid, 2002 [32]         | Women aged 15-55          | Types of VAW                                                     | Multistage sample, trained female interviewers who were psychology students, sometimes accompanied by a second interviewer for safety reasons, interviews conducted in respondent home when adult males are not present.                                                                                                      |
| Alizy, 2017 [51]            | Students aged 11-16       | Relation between family violence and child behavioral issues     | Ethical review from Faculty of Arts and Humanities at Sana'a University, verbal assent from participants, self-completed, anonymous paper survey using validated instrument, participants debriefed after completion of the questionnaire, data collection team trained to handle signs of distress during survey completion. |
| Ouis, 2009 [21]             | Adolescents aged 12-18    | Experience of and attitudes towards honor violence, sexual       | Convenience sample of participants who had experienced sexual violence, no mention of IC, ethical clearance, resources or support, etc.                                                                                                                                                                                       |

| Author, year of publication | Population | Focus                 | Ethics, interviewer training, safety planning |
|-----------------------------|------------|-----------------------|-----------------------------------------------|
|                             |            | abuse, early marriage |                                               |

434 IC=Informed Consent

435 ***Barriers, tools, strategies, and resources for addressing and reporting violence,***  
 436 ***including safety planning***

437 One 2002 study found that only 3% of women who experienced violence went to the  
 438 police, preferring to reach out to parents or relatives or not seek any external support  
 439 rather than the police or legal support [32]. Two studies reported that women could  
 440 only go to the police when accompanied by a male household member, leading to  
 441 underreporting of GBV [32,51]. Most studies did not ask women or children about  
 442 reporting or whether they accessed any resources to address the violence. Religious  
 443 and cultural norms were identified as the most critical barriers to reporting most types  
 444 of VAWC [16,36,43,44]. A cross-sectional study that asked dentists about their intention  
 445 to report suspected VAWC found that only 60% of dentists would report VAWC to the  
 446 police, followed by other agencies in Yemen [55]. A 2017 AMRO regional study by  
 447 UNICEF reported that a shortage of skilled NGO personnel and a lack of awareness of  
 448 available services were key barriers to accessing resources, as NGOs addressing gender-  
 449 related issues do not have the staff to effectively manage reported GBV cases and do  
 450 not well understand how to connect women to services or what services are available  
 451 [7]. The same study found that girls facing GBV and child marriage experience

452 limitations to their mobility due to gender norms and restricted access to money  
453 needed to pay for resources that are generally located outside of their community [7].

454

455 Sexual abuse is highly stigmatized in Yemen, which limits reporting. One study found  
456 that women or girls who were sexually abused face “severe punishment” from their  
457 parents, who might “kill them” or “force them to marry rapists” [21]. The same study  
458 found that adolescent girls in Yemen felt that women and girls could be considered  
459 responsible for the sexual violence they experienced [21]. Two studies highlighted that a  
460 lack of education for girls and women increases their exposure to violence from  
461 husbands compared to more educated women [32,33]. Women reported the  
462 widespread cultural beliefs that they are second-class citizens and belong to men, which  
463 likely complicates their ability to report violence [32]. Poor implementation of the  
464 FGM/C law in Yemen, lack of educational infrastructure, lack of employment  
465 opportunities, and the ongoing conflict were also cited as barriers to reporting [44]. Lack  
466 of awareness of FGM/C status, which is at a very young age, was also cited as a barrier  
467 to reporting [16]

## 468 **Discussion**

469 This systematic review synthesizes evidence from qualitative and quantitative studies on  
470 the types, prevalence, perpetrators of, and risk factors for VAWC in Yemen. The 30  
471 studies included in the analysis collected data on a range of forms of VAWC, including



472 honor violence, female genital mutilation and cutting, early and very early marriage,  
473 tourist marriage, family and intimate partner violence, school-based violence, and  
474 gender inequities in access to food, education, and medical care. Included studies  
475 reported a high prevalence of many forms of violence, including corporal punishment in  
476 schools and intimate partner violence. We identified seven primary research studies  
477 that asked women or children about their experience of violence [21,32,46–49,51] and  
478 nine studies that reused data from the Yemen DHS, MICS, PAFAM, and other national  
479 and sub-national household surveys [16,35–37,40,42–45]. Six additional studies asked  
480 Yemeni dentists about reporting violence [55], students about their attitudes towards  
481 women living with HIV [56], gender differences in the prevalence of depression [54],  
482 women’s perceptions of self-worth in relation to health-seeking behavior [53],  
483 tuberculosis patients on how gender and literacy affect healthcare access [52], and  
484 mothers on the factors that cause their fear of childbirth [34]. Studies measured IPV and  
485 non-partner family violence (both physical and psychological), sexual violence, early  
486 marriage, tourist marriage, child maltreatment, FGM/C, honor violence, child labor,  
487 school-based violence, including corporal punishment, and gender inequities in access  
488 to health care, education, and food. Studies had very different designs and sampling  
489 frameworks, preventing direct comparisons.

490

491 Similar to global trends [63], we found that IPV and other forms of family violence were  
492 the most prevalent forms of violence reported in quantitative studies of different types

493 of VAWC. Studies on structural violence in Yemeni society [31,33] linked political  
494 instability and social exclusion to GBV, including higher rates of violence and social  
495 stigma directed towards marginalized ethnic groups, like the *Muhamasheen*.

#### 496 ***Risk Factors***

497 Risk factors for VAWC included gender inequitable norms and laws, economic instability,  
498 lower SES, rural residence, low levels of parental education, and low levels of education  
499 in women and girls. IPV and FGM/C were linked to a lack of maternal education, cultural  
500 norms and traditions in Yemeni society and, in the case of IPV, restrictive divorce laws.  
501 FGM/C was linked to mothers' experience of FGM/C and early marriage. Child  
502 maltreatment and early child marriage were related to low levels of parental education  
503 and markers of low SES, including larger household size and reduced household income.  
504 These findings align with the determinants of VAWC in humanitarian crises in other  
505 countries, where cultural, economic, and educational factors are related to the  
506 incidence of GBV [64,65]. For example, studies in Sudan and Egypt found that lack of  
507 parental education, older age (where older women are more likely to have undergone  
508 FGM/C), and patriarchal norms were associated with FGM/C [66,67]. One study included  
509 in the review compared attitudes towards honor violence between Yemen, the occupied  
510 Palestinian Territories, and Lebanon and found that adolescent girls from Yemen and  
511 the Palestinian Territories were more likely than Lebanese girls to believe that women  
512 and girls were themselves responsible for their exposure to sexual violence [21].

## 513 **Barriers to reporting VAWC**

514 Barriers to reporting violence included the lack of gender equitable laws, services or  
515 support for women or children who experience violence, and gender-inequitable child  
516 custody laws. Studies found that violence, when reported, was reported to family  
517 members or the local Sheikh, which is consistent with another study that found stigma  
518 and lack of support for women who experienced violence led to underreporting [68].  
519 Yemen could consider female police officers to address that barrier to reporting  
520 violence [32]. The study also found that educational programs and providing mental  
521 health services were effective in reducing violence [68].

## 522 **Violence against children**

523 Preschool & school-aged children and adolescents reported a higher prevalence of  
524 emotional rather than physical abuse, which is consistent with research conducted in  
525 South Africa [69,70]. Studies in this review reported low levels of sexual violence against  
526 children, which is mirrored in global research and likely related to underreporting [71–  
527 73]. Included studies reported that male children experienced higher levels of  
528 maltreatment than female children, which was similar to findings from another study  
529 conducted in Iran [74] but differed from findings in other Arab countries, including  
530 Tunisia and UAE [75]. Although child labor is a significant concern in Yemen, only the  
531 2005 MICS measured this form of violence against children. Rates of corporal violence at  
532 school and child experience of maltreatment or physical abuse seemed much higher in  
533 Yemen than in related contexts, such as Sudan and Syria [76]. One study indicated that

534 children in rural areas encountered elevated levels of corporal punishment in schools  
535 [50], which was supported in another study in Mali and Libya [77]. Risk factors  
536 associated with child abuse and maltreatment, including gender, older age, rural  
537 residence, family socioeconomic status, family size, parent's education, and parent's  
538 alcohol use, were similar to those reported in a study in Saudi Arabia [78] and to  
539 findings from conflict-affected countries, including Pakistan [79] and Myanmar [80].

#### 540 ***Sexual violence***

541 Sexual violence is a common yet highly stigmatized form of VAWC and is subject to high  
542 levels of underreporting [21]. Tourist marriage is a new form of GBV that is a last resort  
543 for families with limited resources to feed their families. Tourist marriage was also  
544 identified as an emerging concern in a study in Giza, Egypt [81]. Policymakers suggest  
545 that poverty reduction and community education [82] can help reduce early marriage in  
546 Yemen and other contexts in the Eastern Mediterranean, South and Southeast Asia and  
547 Africa [83].

#### 548 ***Female genital mutilation and cutting***

549 Yemen has made strides to prevent FGM/C; however, the government's statement  
550 against FGM/C falls short of a nationwide law [44]. In contrast, Egypt has passed a law  
551 that prohibits FGM/C and punishes perpetrators [44,67]. Women's empowerment, the  
552 involvement of religious leaders, and the education of parents and communities have  
553 been cited as pathways towards reducing FGM/C [16,36,43,44].

554 ***Gender inequities in access to medical care, education***

555 Several included studies found gender inequities in healthcare access [35,52,53],  
556 education [45], and nutrition [37]. These studies are similar to those in other gender  
557 inequitable settings where women and girl children have lower levels of access to food  
558 [84], health care [85], and education [86] than males.

559 **Strengths & limitations**

560 This is the first mixed methods systematic review to summarize findings on different  
561 forms of VAWC in Yemen. We searched four biomedical databases and NGO websites  
562 and used snowball sampling to identify primary and secondary research on VAWC.  
563 Limitations stem from the predominantly cross-sectional design of most studies,  
564 constraining the ability to infer causality. Future research should focus on longitudinal  
565 studies to better understand the dynamics of VAWC over time and explore the efficacy  
566 of various intervention strategies. The high levels of stigma surrounding VAWC,  
567 especially sexual violence, may have led to underreporting. Most primary research  
568 studies, other than the large population-representative surveys like DHS and MICS, did  
569 not report on interviewer training to ensure women and children could report on their  
570 experience of violence in a safe environment, free of stigma from the interviewer.  
571 Adequately funding studies and ensuring that well-funded studies have a coherent plan  
572 to address ethical issues in VAWC research could ensure studies on VAWC in Yemen  
573 uphold best practices in ethical research on VAWC in resource-limited contexts.

## 574 **Recommendations for future work**

575 Most studies on VAWC were conducted before the 2014 war in Yemen. The war and  
576 pandemic have increased the frequency and forms of VAWC through multiple avenues.  
577 The humanitarian research and intervention communities should explore and address  
578 the causes and consequences of VAWC, and the international development community  
579 should consider investing in research to develop community-based efforts to support  
580 Yemeni women and children who experience or have experienced violence, including  
581 war-related violence and the associated trauma.

582

583 This review found significant ethical concerns related to existing research, including the  
584 absence of informed consent or ethical review. Only two studies, outside of the DHS and  
585 MICS, mentioned interviewer training, and none of the studies that interviewed women  
586 or children about their experience of violence discussed safety planning or connecting  
587 women and children to available resources. Given the lack of resources in Yemen, using  
588 positive deviance [87] approaches to identify strategies that would be possible and safe  
589 for women and children who experience violence to mitigate or prevent violence.  
590 Yemen is a complex context, and Yemeni women and children need to inform the design  
591 and execution of research and interventions.

## 592 **Policy implications**

593 In keeping with policy-related research in Yemen [88], included studies identified severe  
594 poverty and displacement, cultural norms, societal stigma, and a lack of sufficient legal  
595 protections and support services as barriers to addressing VAWC in Yemen.  
596 Humanitarian support for Yemeni families in need is a crucial starting point to curb child  
597 and forced marriages [89]. Gender-inequitable child custody laws, cultural beliefs that  
598 normalize VAWC, and stigmatizing attitudes towards survivors of violence, including  
599 coercive marriages to preserve family honor in the context of sexual violence and  
600 blaming divorced women, [90] make addressing VAWC extremely complex. Addressing  
601 weak enforcement of protections for women and children [7] and gender inequitable  
602 laws or gaps in legislation, including no minimum age of marriage, should be part of a  
603 national strategy to address VAWC in Yemen [91]. A locally developed and supported  
604 policy action plan is essential for fostering lasting changes in gender-inequitable  
605 attitudes towards women and children [92]. This summary of the current landscape of  
606 VAWC-related research could support the design of a policy agenda that addresses  
607 barriers to measuring, reporting, and responding to VAWC. While not well described in  
608 the included studies, the large-scale conflict and related internal displacement have  
609 intensified GBV in Yemen [93]. Significant investment is needed in research and services,  
610 including basic needs, education, psychological services, and VAWC-related prevention  
611 and mitigation to support Yemeni women and children better. Similarly, child labour, an  
612 important form of violence that was not well explored in the included studies, should be

613 considered in the research and development agenda [94]. By combining efforts to  
614 address gender inequitable laws and harmful cultural practices and providing holistic  
615 support to Yemeni families, Yemen can make strides towards reducing VAWC and  
616 creating a safer environment for women and children [95].

## 617 **Conclusions**

618 VAWC is a global public health and human rights issue that affects the global  
619 community's ability to achieve most of the 17 SDGs. Violence increases in unstable  
620 environments. Understanding and addressing VAWC is context-dependent, requiring  
621 meaningful community engagement, cross-sectoral support, and policy action. This SR  
622 highlights the high levels of VAWC in Yemen, driven by poverty, displacement, and  
623 gender inequitable norms and policies. While we know that VAWC increases during  
624 conflicts and when people are displaced, we did not identify any studies on VAWC that  
625 collected data after the onset of the ongoing conflict in Yemen, which represents a  
626 missed opportunity to understand how the ongoing war has reversed prior gains in  
627 reducing the prevalence of child and very early child marriage and introduced new  
628 forms of gender-based violence, including tourist marriage. The lack of funding for  
629 primary research on VAWC may be one reason why included studies did not report on  
630 interviewer training, mental health support for research participants, or safety planning,  
631 all of which should be included in VAWC-related research in humanitarian settings or  
632 fragile states. Addressing VAWC in Yemen will require a commitment on the part of the  
633 international community to fund locally-led efforts to determine immediate and long-



634 term steps to alleviate the factors that drive VAWC (e.g., war, poverty), prevent and  
635 mitigate VAWC, and address the effects of VAWC on maternal and child health and  
636 related SDGs.

## 637 **Acknowledgements**

638 We want to thank the participants in the primary research studies included in this  
639 review for their courage and honesty in confronting the global challenge of VAWC and  
640 the NGOs and researchers working to ensure that their stories are heard and their needs  
641 addressed.

## 642 **Supporting Information**

643 S1 Table. PRISMA checklist

644 S2 Table. Database-specific search strategies

645 S3 Table. List of articles excluded at full-text review stage with reason for exclusion

646 S1 Text. Data extraction form

647 S4 Table. Overview of quantitative studies and quantitative section of mixed methods

648 studies

649 S5 Table. Quality assessment of included studies

650

## 651 **References**

652 1. Yemen – Emergencies. In: World Food Programme [Internet]. 2023. Available:  
653 <https://www.wfp.org/emergencies/yemen-emergency>

- 654 2. OCHA - Yemen Situation Report 2023. United Nations Office for the Coordination of  
655 Humanitarian Affairs; 2023. Available: <https://reports.unocha.org/en/country/yemen/>
- 656 3. National Plan to Implement Security Council Resolution 1325 Women, Security, and Peace  
657 2020 – 2022 [Internet]. 2019.
- 658 4. Sustainable Development Goals: Yemen. In: United National Development Programme  
659 [Internet]. 2021. Available:  
660 <https://www.ye.undp.org/content/yemen/en/home/sustainable-development-goals.html>
- 661 5. Global Gender Gap Report 2021. World Economic Forum; 2021 Mar. Available:  
662 <https://www.weforum.org/publications/global-gender-gap-report-2021/>
- 663 6. Gender considerations in humanitarian response in Yemen. United Nations Office for the  
664 Coordination of Humanitarian Affairs. In: ReliefWeb Response (RW Response). 2023.
- 665 7. UNICEF & ICRW. Yemen Country Brief - UNICEF Regional Study on Child Marriage In the  
666 Middle East and North Africa. United Nations Children’s Fund (UNICEF); 2017. Available:  
667 <https://www.unicef.org/mena/media/1821/file/%20MENA-CMReport-YemenBrief.pdf.pdf>.  
668 2017.
- 669 8. Findings on the Worst Forms of Child Labor - Yemen. Bureau of International Labor Affairs,  
670 U.S. Department of Labor; 2019. Available:  
671 <https://www.dol.gov/agencies/ilab/resources/reports/child-labor/yemen>
- 672 9. UN Security Council: Children and armed conflict in Yemen - Report of the Secretary-  
673 General (S/2019/453) [EN/AR]. ReliefWeb; 2019. Available:  
674 [https://reliefweb.int/report/yemen/children-and-armed-conflict-yemen-report-secretary-  
675 general-s2019453-enar](https://reliefweb.int/report/yemen/children-and-armed-conflict-yemen-report-secretary-general-s2019453-enar)
- 676 10. Children of Yemen. In: Humanium [Internet]. 2021. Available:  
677 <https://www.humanium.org/en/yemen/>
- 678 11. Fact Sheet: Violence Against Women. In: World Health Organization [Internet]. Jun 2020  
679 [cited 8 Jun 2020]. Available: [https://www.who.int/news-room/fact-  
680 sheets/detail/violence-against-women](https://www.who.int/news-room/fact-sheets/detail/violence-against-women)
- 681 12. Ministry of Public Health and Population - MOPHP/Yemen, Central Statistical Organization  
682 - CSO/Yemen, Pan Arab Program for Family Health - PAPFAM, ICF International. Yemen  
683 National Health and Demographic Survey 2013. Rockville, Maryland, USA: MOPHP, CSO,  
684 PAPFAM, and ICF International; 2015. Available:  
685 <http://dhsprogram.com/pubs/pdf/FR296/FR296.pdf>
- 686 13. Country Assessment on Violence against Women, Yemen (2010). United Nations; 2010.  
687 Available:  
688 [https://www.un.org/womenwatch/ianwge/taskforces/vaw/Country\\_Assessment\\_on\\_Viol  
689 ence\\_against\\_Women\\_August\\_2\\_2010.pdf](https://www.un.org/womenwatch/ianwge/taskforces/vaw/Country_Assessment_on_Violence_against_Women_August_2_2010.pdf)

- 690 14. Factsheet: Child Maltreatment. In: World Health Organization [Internet]. World Health  
691 Organization; Jun 2020 [cited 8 Jun 2020]. Available: [https://www.who.int/news-](https://www.who.int/news-room/fact-sheets/detail/child-maltreatment/)  
692 [room/fact-sheets/detail/child-maltreatment/](https://www.who.int/news-room/fact-sheets/detail/child-maltreatment/)
- 693 15. Fact Sheet: Violence Against Children. In: World Health Organization [Internet]. Jun 2020  
694 [cited 8 Jun 2020]. Available: [https://www.who.int/news-room/fact-](https://www.who.int/news-room/fact-sheets/detail/violence-against-children)  
695 [sheets/detail/violence-against-children](https://www.who.int/news-room/fact-sheets/detail/violence-against-children)
- 696 16. Al-Khulaidi GA, Nakamura K, Seino K, Kizuki M. Decline of Supportive Attitudes among  
697 Husbands toward Female Genital Mutilation and Its Association to Those Practices in  
698 Yemen. Behrens T, editor. PLoS ONE. 2013;8: e83140. doi:10.1371/journal.pone.0083140
- 699 17. Fact Sheet: Female Genital Mutilation. In: World Health Organization [Internet]. 2020  
700 [cited 3 Feb 2020]. Available: [https://www.who.int/en/news-room/fact-](https://www.who.int/en/news-room/fact-sheets/detail/female-genital-mutilation)  
701 [sheets/detail/female-genital-mutilation](https://www.who.int/en/news-room/fact-sheets/detail/female-genital-mutilation).
- 702 18. UNDP Human Development Report - Gender Inequality Index. United Nations  
703 Development Programme; Available: [https://hdr.undp.org/data-center/thematic-](https://hdr.undp.org/data-center/thematic-composite-indices/gender-inequality-index#/indicies/GII)  
704 [composite-indices/gender-inequality-index#/indicies/GII](https://hdr.undp.org/data-center/thematic-composite-indices/gender-inequality-index#/indicies/GII)
- 705 19. SIGI 2019 Global Report. OECD; 2019. Available: [https://www.oecd-](https://www.oecd-ilibrary.org/content/publication/bc56d212-en)  
706 [ilibrary.org/content/publication/bc56d212-en](https://www.oecd-ilibrary.org/content/publication/bc56d212-en) [https://www.genderindex.org/country-](https://www.genderindex.org/country-profiles/)  
707 [profiles/](https://www.genderindex.org/country-profiles/)
- 708 20. Alaimo K. Increased Efforts by Modern States to Improve Their Reputations for Enforcing  
709 Women’s Human Rights. *Int J Commun.* 2016;10: 2481–2500.
- 710 21. Ouis P. Honourable Traditions? Honour Violence, Early Marriage and Sexual Abuse of  
711 Teenage Girls in Lebanon, the Occupied Palestinian Territories and Yemen. *Int J Child*  
712 *Rights.* 2009;17: 445–474. doi:10.1163/157181808X389911
- 713 22. Country Reports on Human Rights Practices: Yemen for 2016. Bureau of Democracy,  
714 Human Rights and Labor, United States Department of State; 2016. Available:  
715 <https://www.state.gov/reports/2016-country-reports-on-human-rights-practices/yemen/>.
- 716 23. Pearson A, White H, Bath-Hextall F, Salmond S, Apostolo J, Kirkpatrick P. A mixed-methods  
717 approach to systematic reviews. *Int J Evid Based Healthc.* 2015;13: 121–131.  
718 doi:10.1097/XEB.0000000000000052
- 719 24. PRISMA-P Group, Moher D, Shamseer L, Clarke M, Ghersi D, Liberati A, et al. Preferred  
720 reporting items for systematic review and meta-analysis protocols (PRISMA-P) 2015  
721 statement. *Syst Rev.* 2015;4: 1. doi:10.1186/2046-4053-4-1
- 722 25. Page MJ, McKenzie JE, Bossuyt PM, Boutron I, Hoffmann TC, Mulrow CD, et al. The PRISMA  
723 2020 statement: an updated guideline for reporting systematic reviews. *BMJ.* 2021; n71.  
724 doi:10.1136/bmj.n71

- 725 26. Kohli A. Snowballing in Systematic Literature Review. In: LinkedIn [Internet]. 4 Jul 2020.  
726 Available: [https://www.linkedin.com/pulse/snowballing-systematic-literature-review-](https://www.linkedin.com/pulse/snowballing-systematic-literature-review-amanpreet-kohli/)  
727 [amanpreet-kohli/](https://www.linkedin.com/pulse/snowballing-systematic-literature-review-amanpreet-kohli/).
- 728 27. Deduplicating in EndNote - An earlier version of the “Bramer method” for deduplicating.  
729 In: McGill Library [Internet]. 2021. Available: [https://libraryguides.mcgill.ca/knowledge-](https://libraryguides.mcgill.ca/knowledge-syntheses/deduplicating#s-lg-box-16286927)  
730 [syntheses/deduplicating#s-lg-box-16286927](https://libraryguides.mcgill.ca/knowledge-syntheses/deduplicating#s-lg-box-16286927)
- 731 28. Covidence Systematic Review Software, Veritas Health Innovation, Melbourne, Australia.  
732 In: Covidence [Internet]. 2023. Available: [www.covidence.org](http://www.covidence.org)
- 733 29. Thomas J, Harden A. Methods for the thematic synthesis of qualitative research in  
734 systematic reviews. *BMC Med Res Methodol*. 2008;8: 45. doi:10.1186/1471-2288-8-45
- 735 30. Hong QN, Fàbregues S, Bartlett G, Boardman F, Cargo M, Dagenais P, et al. The Mixed  
736 Methods Appraisal Tool (MMAT) version 2018 for information professionals and  
737 researchers. *Educ Inf*. 2018;34: 285–291. doi:10.3233/EFI-180221
- 738 31. Christiansen C, Al-Thawr S. *Muhameseen* activism: enacting citizenship during Yemen’s  
739 transition. *Citizen Stud*. 2019;23: 115–138. doi:10.1080/13621025.2019.1583725
- 740 32. Ba-Obaid M, Bijleveld CCJH. Violence Against Women in Yemen: Official Statistics and an  
741 Exploratory Survey. *Int Rev Vict*. 2002;9: 331–347. doi:10.1177/026975800200900306
- 742 33. Lewis A. Violent crime and fragility: a study on violent offending among children and  
743 young people in Yemen. 2013. Available:  
744 <https://api.semanticscholar.org/CorpusID:152969638>
- 745 34. Kempe A, Theorell T, Alwazer FN-A, Taher SA, Christensson K. Exploring women’s fear of  
746 childbirth in a high maternal mortality setting on the Arabian Peninsula. *Glob Ment Health*.  
747 2015;2: e10. doi:10.1017/gmh.2015.6
- 748 35. Calu Costa J, Wehrmeister FC, Barros AJ, Victora CG. Gender bias in careseeking practices  
749 in 57 low- and middle-income countries. *J Glob Health*. 2017;7: 010418.  
750 doi:10.7189/jogh.07.010418
- 751 36. Liang M, Loaiza E, Diop NJ, Legesse B. Demographic perspectives of female genital  
752 mutilation. Reisel D, editor. *Int J Hum Rights Healthc*. 2016;9: 3–28. doi:10.1108/IJHRH-05-  
753 2015-0017
- 754 37. Mesbah Fathy Sharaf, Rashad AS, Elhussien Ibrahim Mansour. Son Preference and Child  
755 Under Nutrition in the Arab Countries: Is There a Gender Bias Against Girls? 2019 [cited 8  
756 Feb 2024]. doi:10.13140/RG.2.2.24901.09443
- 757 38. Central Statistical Organization/Yemen, Pan Arab Project for Child Development, Macro  
758 International. Yemen Demographic and Maternal and Child Health Survey 1991/1992.  
759 Calverton, Maryland, USA: Central Statistical Organization/Yemen and Macro  
760 International; 1994. Available: <http://dhsprogram.com/pubs/pdf/FR52/FR52.pdf>

- 761 39. Central Statistical Organization/Yemen, Macro International. Yemen Demographic and  
762 Maternal and Child Health Survey 1997. Calverton, Maryland, USA: Central Statistical  
763 Organization/Yemen and Macro International; 1998. Available:  
764 <http://dhsprogram.com/pubs/pdf/FR94/FR94.pdf>
- 765 40. Akmatov MK. Child abuse in 28 developing and transitional countries--results from the  
766 Multiple Indicator Cluster Surveys. *Int J Epidemiol.* 2011;40: 219–227.  
767 doi:10.1093/ije/dyq168
- 768 41. Ministry of Health and Population (Yemen), United Nations Children’s Fund (UNICEF), Pan  
769 Arab, Program for Family Health (PAPFAM). Yemen Multiple Indicator Cluster Survey 2006,  
770 Final Report. Rockville, Maryland, USA: MOPHP, CSO, PAPFAM, and ICF International;  
771 2015. Available: [https://mics.unicef.org/survey\\_archives/yemen/survey0/index.html](https://mics.unicef.org/survey_archives/yemen/survey0/index.html)
- 772 42. Smits J, Huisman J. Determinants of educational participation and gender differences in  
773 education in six Arab countries. *Acta Sociol.* 2013;56: 325–346.  
774 doi:10.1177/0001699313496259
- 775 43. Yoder PS, Wang S, Johansen E. Estimates of Female Genital Mutilation/Cutting in 27  
776 African Countries and Yemen. *Stud Fam Plann.* 2013;44: 189–204. doi:10.1111/j.1728-  
777 4465.2013.00352.x
- 778 44. Alosaimi AN, Essén B, Riitta L, Nwaru BI, Mouniri H. Factors associated with female genital  
779 cutting in Yemen and its policy implications. *Midwifery.* 2019;74: 99–106.  
780 doi:10.1016/j.midw.2019.03.010
- 781 45. Assaad R, Hendy R, Salehi-Isfahani D. Inequality of opportunity in educational attainment  
782 in the Middle East and North Africa: Evidence from household surveys. *Int J Educ Dev.*  
783 2019;71: 102070. doi:10.1016/j.ijedudev.2019.05.005
- 784 46. Al-Taj MA, Al-hadari MH. Prevalence and drivers of female genital mutilation/cutting in  
785 three coastal governorates in Yemen. *BMC Public Health.* 2023;23: 1363.  
786 doi:10.1186/s12889-023-16299-y
- 787 47. Ba- Saddik ASS, Hattab AS. Emotional abuse towards children by schoolteachers in Aden  
788 Governorate, Yemen: A cross-sectional study. *BMC Public Health.* 2012;12: 647.  
789 doi:10.1186/1471-2458-12-647
- 790 48. Ba Saddik AS, Hattab AS. Physical abuse in basic-education schools in Aden governorate,  
791 Yemen: a cross-sectional study. *East Mediterr Health J.* 2013;19: 333–339.  
792 doi:10.26719/2013.19.4.333
- 793 49. Bamatraf FF. Prevalence and Risk Factors of Childhood Abuse among Hadhramout  
794 University Students in Yemen. *World Fam Med.* 2019;17: 42–54.  
795 doi:10.5742MEWFM.2019.93645
- 796 50. Alyahri A, Goodman R. Harsh corporal punishment of Yemeni children: Occurrence, type  
797 and associations. *Child Abuse Negl.* 2008;32: 766–773. doi:10.1016/j.chiabu.2008.01.001

- 798 51. Alizy A, Calvete E, Bushman BJ. Associations Between Experiencing and Witnessing  
799 Physical and Psychological Abuse and Internalizing and Externalizing Problems in Yemeni  
800 Children. *J Fam Violence*. 2017;32: 585–593. doi:10.1007/s10896-017-9916-5
- 801 52. Date J, Okita K. Gender and literacy: factors related to diagnostic delay and unsuccessful  
802 treatment of tuberculosis in the mountainous area of Yemen. *Int J Tuberc Lung Dis Off J Int*  
803 *Union Tuberc Lung Dis*. 2005;9: 680–685.
- 804 53. Chamberlain J, Watt S, Mohide P, Muggah H, Trim K, Bantebya Kyomuhendo G. Women’s  
805 perception of self-worth and access to health care. *Int J Gynecol Obstet*. 2007;98: 75–79.  
806 doi:10.1016/j.ijgo.2007.03.019
- 807 54. Alansari BM. GENDER DIFFERENCES IN DEPRESSION AMONG UNDERGRADUATES FROM  
808 SEVENTEEN ISLAMIC COUNTRIES. *Soc Behav Personal Int J*. 2006;34: 729–738.  
809 doi:10.2224/sbp.2006.34.6.729
- 810 55. El Tantawi M, Gaffar B, Arheiam A, AbdelAziz W, Al-Batayneh OB, Alhoti MF, et al. Dentists’  
811 intention to report suspected violence: a cross-sectional study in eight Arab countries. *BMJ*  
812 *Open*. 2018;8: e019786. doi:10.1136/bmjopen-2017-019786
- 813 56. Badahdah AM. Attitudes Toward Restricting the Sexual and Reproductive Rights of Women  
814 Living With HIV Infection in Yemen. *J Assoc Nurses AIDS Care*. 2016;27: 180–187.  
815 doi:10.1016/j.jana.2015.10.006
- 816 57. Kronfol NM. Access and barriers to health care delivery in Arab countries: a review. *East*  
817 *Mediterr Health J*. 2012;18: 1239–1246. doi:10.26719/2012.18.12.1239
- 818 58. Peterman A, Devries K, Guedes A, Chandan JS, Minhas S, Lim RQH, et al. Ethical reporting  
819 of research on violence against women and children: a review of current practice and  
820 recommendations for future guidelines. *BMJ Glob Health*. 2023;8: e011882.
- 821 59. Bott S, Ruiz-Celis AP, Mendoza JA, Guedes A. Co-occurring violent discipline of children and  
822 intimate partner violence against women in Latin America and the Caribbean: a systematic  
823 search and secondary analysis of national datasets. *BMJ Glob Health*. 2021;6: e007063.  
824 doi:10.1136/bmjgh-2021-007063
- 825 60. Guidelines for Producing Statistics on Violence against Women-Statistical Surveys. New  
826 York: United Nations Department of Economic and Social Affairs Statistics Division; 2014.  
827 Available: [https://unstats.un.org/unsd/gender/docs/guidelines\\_statistics\\_vaw.pdf](https://unstats.un.org/unsd/gender/docs/guidelines_statistics_vaw.pdf)
- 828 61. Hancioglu A, Arnold F. Measuring Coverage in MNCH: Tracking Progress in Health for  
829 Women and Children Using DHS and MICS Household Surveys. Madise N, editor. *PLoS*  
830 *Med*. 2013;10: e1001391. doi:10.1371/journal.pmed.1001391
- 831 62. UNICEF Multiple Indicator Cluster Survey Manual 2005. United Nations International  
832 Children’s Emergency Fund; 2007 Apr. Available:  
833 <https://mics.unicef.org/files?job=W1siZiIsIjIwMDUvMDQvMDIvMDYvMzcvMDYvMTE5L011bHRpcGxlX0luZGljYXRvcj9DbHVzdGVyX1N1cnZleV9NYW51YWxfMjAwnS5wZGYiXV0&sha=dd2e54d1ddd61cdb>  
834  
835

- 836 63. Overview of Gender-Based Violence. Gender Data Portal. In: World Bank [Internet]. 1 Oct  
837 2022 [cited 15 Jan 2024]. Available: [https://genderdata.worldbank.org/data-](https://genderdata.worldbank.org/data-stories/overview-of-gender-based-violence/)  
838 [stories/overview-of-gender-based-violence/](https://genderdata.worldbank.org/data-stories/overview-of-gender-based-violence/)
- 839 64. Raftery P, Howard N, Palmer J, Hossain M. Gender-based violence (GBV) coordination in  
840 humanitarian and public health emergencies: a scoping review. *Confl Health*. 2022;16: 37.  
841 doi:10.1186/s13031-022-00471-z
- 842 65. Murphy M, Ellsberg M, Balogun A, Garcia-Moreno C. Risk and protective factors for GBV  
843 among women and girls living in humanitarian setting: systematic review protocol. *Syst*  
844 *Rev*. 2021;10: 238. doi:10.1186/s13643-021-01795-2
- 845 66. Elduma AH. Female Genital Mutilation in Sudan. *Open Access Maced J Med Sci*. 2018;6:  
846 430–434. doi:10.3889/oamjms.2018.099
- 847 67. Arafa A, Mostafa A, Eshak ES. Prevalence and risk factors of female genital mutilation in  
848 Egypt: a systematic review. *Clin Epidemiol Glob Health*. 2020;8: 850–857.  
849 doi:10.1016/j.cegh.2020.02.012
- 850 68. Douki S, Nacef F, Belhadj A, Bouasker A, Ghachem R. Violence against women in Arab and  
851 Islamic countries. *Arch Womens Ment Health*. 2003;6: 165–171. doi:10.1007/s00737-003-  
852 0170-x
- 853 69. Meinck F, Cluver L, Loening-Voysey H, Bray R, Doubt J, Casale M, et al. Disclosure of  
854 physical, emotional and sexual child abuse, help-seeking and access to abuse response  
855 services in two South African Provinces. *Psychol Health Med*. 2017;22: 94–106.  
856 doi:10.1080/13548506.2016.1271950
- 857 70. Stoltenborgh M, Bakermans-Kranenburg MJ, Alink LRA, Van IJzendoorn MH. The  
858 Prevalence of Child Maltreatment across the Globe: Review of a Series of Meta-Analyses.  
859 *Child Abuse Rev*. 2015;24: 37–50. doi:10.1002/car.2353
- 860 71. Dworkin ER, Krahé B, Zinzow H. The global prevalence of sexual assault: A systematic  
861 review of international research since 2010. *Psychol Violence*. 2021;11: 497–508.  
862 doi:10.1037/vio0000374
- 863 72. UNICEF. A Statistical Profile of Violence Against Children in Latin America and the  
864 Caribbean. New York: © United Nations Children’s Fund (UNICEF), Division of Data,  
865 Analytics, Planning and Monitoring; 2022. Available:  
866 [https://www.unicef.org/lac/media/38241/file/A-statistical-profile-of-violence-against-](https://www.unicef.org/lac/media/38241/file/A-statistical-profile-of-violence-against-children-in-latin-america-and-the-caribbean.pdf)  
867 [children-in-latin-america-and-the-caribbean.pdf](https://www.unicef.org/lac/media/38241/file/A-statistical-profile-of-violence-against-children-in-latin-america-and-the-caribbean.pdf).
- 868 73. Agüero JM, Frisancho V. Measuring Violence against Women with Experimental Methods.  
869 *Econ Dev Cult Change*. 2022;70: 1565–1590. doi:10.1086/714008
- 870 74. Stephenson R, Sheikhattari P, Assasi N, Eftekhari H, Zamani Q, Maleki B, et al. Child  
871 maltreatment among school children in the Kurdistan Province, Iran. *Child Abuse Negl*.  
872 2006;30: 231–245. doi:10.1016/j.chiabu.2005.10.009

- 873 75. Kelly S. Recent Gains and New Opportunities for Women’s Rights in the Gulf Arab States.  
874 Freedom House; 2009. Available: [https://freedomhouse.org/article/womens-activists-see-](https://freedomhouse.org/article/womens-activists-see-gains-gulf-arab-states)  
875 [gains-gulf-arab-states](https://freedomhouse.org/article/womens-activists-see-gains-gulf-arab-states)
- 876 76. UNICEF. A Profile of Violence against Children and Adolescents in the Middle East and  
877 North Africa. New York: UNICEF Division of Data, Research and Poli; 2018 Jul. Available:  
878 [https://www.unicef.org/mena/reports/profile-violence-against-children-and-adolescents-](https://www.unicef.org/mena/reports/profile-violence-against-children-and-adolescents-middle-east-and-north-africa)  
879 [middle-east-and-north-africa](https://www.unicef.org/mena/reports/profile-violence-against-children-and-adolescents-middle-east-and-north-africa)
- 880 77. Violence is predominantly rural in North and West Africa. In: OECD [Internet]. 21 Mar 2023  
881 [cited 15 Jan 2024]. Available:  
882 [https://www.oecd.org/swac/news/violenceispredominantlyruralinnorthandwestafrica.ht](https://www.oecd.org/swac/news/violenceispredominantlyruralinnorthandwestafrica.htm)  
883 [m](https://www.oecd.org/swac/news/violenceispredominantlyruralinnorthandwestafrica.htm)
- 884 78. Al-Eissa MA, AlBuhairan FS, Qayad M, Saleheen H, Runyan D, Almuneef M. Determining  
885 child maltreatment incidence in Saudi Arabia using the ICAST-CH: a pilot study. *Child Abuse*  
886 *Negl.* 2015;42: 174–182. doi:10.1016/j.chiabu.2014.08.016
- 887 79. Lakhdar MPA, Farooq S, Khan UR, Parpio Y, Azam SI, Razzak J, et al. Factors Associated With  
888 Child Maltreatment Among Children Aged 11 to 17 Years in Community Settings of  
889 Karachi, Pakistan, Using Belsky Ecological Framework. *J Interpers Violence.* 2021;36: 297–  
890 313. doi:10.1177/0886260517726973
- 891 80. Aye WT, Lien L, Stigum H, Bjertness E. Childhood abuse and its association with adults’  
892 mental health problems: a cross-sectional study among men and women in the Yangon  
893 Region of Myanmar. *BMJ Open.* 2021;11: e045870. doi:10.1136/bmjopen-2020-045870
- 894 81. Soliman HH, Alsharqawi NI, Younis MA. Is Tourism Marriage of Young Girls in Egypt a Form  
895 of Child Sexual Abuse? A Family Exploitation Perspective. *J Child Sex Abuse.* 2018;27: 122–  
896 140. doi:10.1080/10538712.2018.1425945
- 897 82. Ending Child Marriage: A Guide for Global Policy Action. UN Population Fund (UNFPA):  
898 International Planned Parenthood Federation; Forum on Marriage and the Rights of  
899 Women and Girls; 2006. Available: [https://www.unfpa.org/sites/default/files/pub-](https://www.unfpa.org/sites/default/files/pub-pdf/endchildmarriage.pdf)  
900 [pdf/endchildmarriage.pdf](https://www.unfpa.org/sites/default/files/pub-pdf/endchildmarriage.pdf)
- 901 83. Pourtaheri A, Sany SBT, Aghaee MA, Ahangari H, Peyman N. Prevalence and factors  
902 associated with child marriage, a systematic review. *BMC Womens Health.* 2023;23: 531.  
903 doi:10.1186/s12905-023-02634-3
- 904 84. Gender and Food Security and Nutrition. In: Food and Agriculture Organization (FAO)  
905 [Internet]. 2024. Available: [https://www.fao.org/gender/learning-center/thematic-](https://www.fao.org/gender/learning-center/thematic-areas/gender-and-food-security-and-nutrition/)  
906 [areas/gender-and-food-security-and-nutrition/](https://www.fao.org/gender/learning-center/thematic-areas/gender-and-food-security-and-nutrition/)
- 907 85. Kennedy E, Binder G, Humphries-Waa K, Tidhar T, Cini K, Comrie-Thomson L, et al. Gender  
908 inequalities in health and wellbeing across the first two decades of life: an analysis of 40  
909 low-income and middle-income countries in the Asia-Pacific region. *Lancet Glob Health.*  
910 2020;8: e1473–e1488. doi:10.1016/S2214-109X(20)30354-5



- 911 86. Kattan RB, Khan MM. Closing the Gap: Tackling Remaining Disparities in Girls' Education  
912 and Women's Labor Market. In: World Bank Blogs [Internet]. 9 Mar 2023. Available:  
913 [https://blogs.worldbank.org/education/closing-gap-tackling-remaining-disparities-girls-](https://blogs.worldbank.org/education/closing-gap-tackling-remaining-disparities-girls-education-and-womens-labor-market)  
914 [education-and-womens-labor-market](https://blogs.worldbank.org/education/closing-gap-tackling-remaining-disparities-girls-education-and-womens-labor-market)
- 915 87. Marsh DR, Schroeder DG, Dearden KA, Sternin J, Sternin M. The power of positive  
916 deviance. *BMJ*. 2004;329: 1177–1179. doi:10.1136/bmj.329.7475.1177
- 917 88. Al-Dhamari R. The Struggle of Yemeni Women between War and Harmful Social Norms. In:  
918 ReliefWeb [Internet]. 3 Feb 2021 [cited 15 Jan 2024]. Available:  
919 [https://reliefweb.int/report/yemen/struggle-yemeni-women-between-war-and-harmful-](https://reliefweb.int/report/yemen/struggle-yemeni-women-between-war-and-harmful-social-norms)  
920 [social-norms](https://reliefweb.int/report/yemen/struggle-yemeni-women-between-war-and-harmful-social-norms)
- 921 89. Yemen Country Profile of Phase I: UNFPA-UNICEF Global Programme to End Child  
922 Marriage. United Nations Children's Fund (UNICEF); 2019. Available:  
923 <https://www.unicef.org/media/88851/file/Child-marriage-Yemen-profile-2019.pdf>
- 924 90. Obligating Obedience. Violations of Women's Rights in Yemen. Human Rights Watch; 2015  
925 Jan. Available: [https://www.hrw.org/reports/yemen0115\\_web.pdf](https://www.hrw.org/reports/yemen0115_web.pdf)
- 926 91. Yemen Gender Justice & The Law. United Nations Development Programme. New York:  
927 UNDP, UN Women, UNFPA, ESCWA; 2018. Available:  
928 [https://www.undp.org/sites/g/files/zskgke326/files/migration/arabstates/Yemen-](https://www.undp.org/sites/g/files/zskgke326/files/migration/arabstates/Yemen-Country-Assessment---English.pdf)  
929 [Country-Assessment---English.pdf](https://www.undp.org/sites/g/files/zskgke326/files/migration/arabstates/Yemen-Country-Assessment---English.pdf)
- 930 92. Shang B. Tackling Gender Inequality: Definitions, Trends, and Policy Designs. *IMF Work*  
931 *Pap.* 2022;2022: 1. doi:10.5089/9798400224843.001
- 932 93. Humanitarian Action for Children Yemen - June Update. United Nations Children's Fund  
933 (UNICEF); 2021. Available: [https://www.unicef.org/media/102341/file/2021-HAC-Yemen-](https://www.unicef.org/media/102341/file/2021-HAC-Yemen-June-Update.pdf)  
934 [June-Update.pdf](https://www.unicef.org/media/102341/file/2021-HAC-Yemen-June-Update.pdf)
- 935 94. Ahmed A, Almassajdi A. Child Labor's Frightening Growth During the War in Yemen. In:  
936 University of Oregon-UNESCO Crossings Institute [Internet]. 5 Nov 2021. Available:  
937 [https://unesco.uoregon.edu/2022/01/22/child-labors-frightening-growth-during-the-war-](https://unesco.uoregon.edu/2022/01/22/child-labors-frightening-growth-during-the-war-in-yemen/)  
938 [in-yemen/](https://unesco.uoregon.edu/2022/01/22/child-labors-frightening-growth-during-the-war-in-yemen/)
- 939 95. Intensify efforts to prevent violence against women and girls. In: ReliefWeb [Internet]. 10  
940 Dec 2023. Available: [https://reliefweb.int/report/yemen/intensify-efforts-prevent-](https://reliefweb.int/report/yemen/intensify-efforts-prevent-violence-against-women-and-girls)  
941 [violence-against-women-and-girls](https://reliefweb.int/report/yemen/intensify-efforts-prevent-violence-against-women-and-girls)

942
